# Supplementary material for: Frontal eye field and caudate neurons make different contributions to reward-biased perceptual decisions
Source: eLife. 2020 Nov 27;9:e60535. doi: 10.7554/eLife.60535 (PMC7695458; doi:10.7554/eLife.60535)
Supplement: Figure 3—source data 1. [file elife-60535-fig3-data1.csv]

FEF, coh,choice,fraction	FEF, coh,choice,pChiSquare	FEF, coh,rewcont,fraction	FEF, coh,rewcont,pChiSquare	FEF, coh,rewsize,fraction	FEF, coh,rewsize,pChiSquare	FEF, coh,cohEither,fraction	FEF, coh,cohEither,pChiSquare	FEF, coh,cohxRewEither,fraction	FEF, coh,cohxRewEither,pChiSquare	FEF, coh,add or multiply,fraction	FEF, coh,add or multiply,pChiSquare	Caudate, coh,choice,fraction	Caudate, coh,choice,pChiSquare	Caudate, coh,rewcont,fraction	Caudate, coh,rewcont,pChiSquare	Caudate, coh,rewsize,fraction	Caudate, coh,rewsize,pChiSquare	Caudate, coh,cohEither,fraction	Caudate, coh,cohEither,pChiSquare	Caudate, coh,cohxRewEither,fraction	Caudate, coh,cohxRewEither,pChiSquare	Caudate, coh,add or multiply,fraction	Caudate, coh,add or multiply,pChiSquare	FEF, RTnorm,choice,fraction	FEF, RTnorm,choice,pChiSquare	FEF, RTnorm,rewcont,fraction	FEF, RTnorm,rewcont,pChiSquare	FEF, RTnorm,rewsize,fraction	FEF, RTnorm,rewsize,pChiSquare	FEF, RTnorm,RTnormEither,fraction	FEF, RTnorm,RTnormEither,pChiSquare	FEF, RTnorm,RTnormxRewEither,fraction	FEF, RTnorm,RTnormxRewEither,pChiSquare	FEF, RTnorm,add or multiply,fraction	FEF, RTnorm,add or multiply,pChiSquare	Caudate, RTnorm,choice,fraction	Caudate, RTnorm,choice,pChiSquare	Caudate, RTnorm,rewcont,fraction	Caudate, RTnorm,rewcont,pChiSquare	Caudate, RTnorm,rewsize,fraction	Caudate, RTnorm,rewsize,pChiSquare	Caudate, RTnorm,RTnormEither,fraction	Caudate, RTnorm,RTnormEither,pChiSquare	Caudate, RTnorm,RTnormxRewEither,fraction	Caudate, RTnorm,RTnormxRewEither,pChiSquare	Caudate, RTnorm,add or multiply,fraction	Caudate, RTnorm,add or multiply,pChiSquare	FEF~=Caudate,coh,choice	FEF~=Caudate,coh,rewcont
0.040268456375838924	0.5857262771092364	0.12080536912751678	7.320141881397595e-05	0.026845637583892617	0.1946936862273362	0.11409395973154363	0.49470964078869517	0.09395973154362416	0.8841730880142369	0.10738255033557047	0.9588023213301975	0.02857142857142857	0.24468748586592676	0.10714285714285714	0.0019204470127155739	0.06428571428571428	0.4380048482726958	0.09285714285714286	0.853078041046677	0.11428571428571428	0.5031496939549007	0.12142857142857143	0.5553434383711593	0.06040268456375839	0.5601433843724472	0.19463087248322147	5.477146482162038e-16	0.06711409395973154	0.3378016543492214	0.1342281879194631	0.13069781902655345	0.06711409395973154	0.21116350737943881	0.12751677852348994	0.39545447052331006	0.02857142857142857	0.24468748586592676	0.16428571428571428	5.485925650621622e-10	0.06428571428571428	0.4380048482726958	0.10714285714285714	0.7005111161780042	0.14285714285714285	0.07042173927598644	0.14285714285714285	0.15761549406973896	0.24348651494593088	0.34601986495476855
0.06711409395973154	0.3378016543492214	0.14093959731543623	3.518820719146178e-07	0.06040268456375839	0.5601433843724472	0.08053691275167785	0.4851604141969048	0.08053691275167785	0.4851604141969048	0.09395973154362416	0.6309307609800954	0.02142857142857143	0.1208697020218832	0.18571428571428572	1.7335755601769786e-13	0.05714285714285714	0.6981763553291203	0.07142857142857142	0.2983737289941829	0.08571428571428572	0.6382806649119356	0.08571428571428572	0.4339193668440885	0.06040268456375839	0.5601433843724472	0.21476510067114093	2.75514925004733e-20	0.08053691275167785	0.08721102180172363	0.12080536912751678	0.3375536281780772	0.09395973154362416	0.8841730880142369	0.12080536912751678	0.5594017094160468	0.04285714285714286	0.6981763553291203	0.21428571428571427	4.704432705917689e-19	0.06428571428571428	0.4380048482726958	0.08571428571428572	0.6382806649119356	0.12857142857142856	0.21521025283373776	0.1357142857142857	0.25483584221165	5.2309172917832915e-05	0.10156235344282484
0.06711409395973154	0.3378016543492214	0.1476510067114094	4.520955155527115e-08	0.04697986577181208	0.8656784817688281	0.11409395973154363	0.49470964078869517	0.06711409395973154	0.21116350737943881	0.087248322147651	0.45539314286438826	0.04285714285714286	0.6981763553291203	0.15	5.668111769116968e-08	0.03571428571428571	0.4380048482726958	0.08571428571428572	0.6382806649119356	0.07142857142857142	0.2983737289941829	0.07857142857142857	0.29053106596254374	0.08053691275167785	0.08721102180172363	0.18120805369127516	2.0023746501359616e-13	0.040268456375838924	0.5857262771092364	0.14093959731543623	0.07385208549097809	0.12751677852348994	0.2167624087856197	0.1342281879194631	0.2645059524796454	0.03571428571428571	0.4380048482726958	0.24285714285714285	1.1845401103966252e-25	0.06428571428571428	0.4380048482726958	0.09285714285714286	0.853078041046677	0.07857142857142857	0.45023960337752555	0.10714285714285714	0.9674056689802671	0.0911903416193758	0.44419014654853595
0.174496644295302	3.10808898817892e-12	0.11409395973154363	0.0003310033521722483	0.06711409395973154	0.3378016543492214	0.24161073825503357	3.0271129434437714e-09	0.11409395973154363	0.49470964078869517	0.1610738255033557	0.02926103332372978	0.20714285714285716	1.4479472210298342e-17	0.32142857142857145	3.798546492896502e-49	0.08571428571428572	0.052511465567680646	0.2714285714285714	3.988270027026196e-12	0.16428571428571428	0.007723522206810517	0.22857142857142856	2.5188774837876435e-06	0.3691275167785235	1.8957271157830734e-71	0.19463087248322147	5.477146482162038e-16	0.0738255033557047	0.1820704040000451	0.2751677852348993	2.6519058246499275e-13	0.2214765100671141	3.367893045238909e-07	0.28187919463087246	3.2007387035732256e-12	0.4142857142857143	4.70273469034241e-87	0.42142857142857143	1.9981398438389747e-90	0.19285714285714287	8.788010910061364e-15	0.32857142857142857	3.0584508033265795e-20	0.17142857142857143	0.0031897460273183666	0.2785714285714286	3.407726993633445e-11	0.2048235636308136	1.6803552214199765e-08
0.30201342281879195	3.085597985749423e-45	0.14093959731543623	3.518820719146178e-07	0.09395973154362416	0.013813559709843297	0.2684563758389262	1.995292031982906e-12	0.10738255033557047	0.6842544214094923	0.18120805369127516	0.002900768033579907	0.2785714285714286	2.3335396735230684e-35	0.3142857142857143	1.0967844544143841e-46	0.07857142857142857	0.1208697020218832	0.3357142857142857	2.0629211922744585e-21	0.20714285714285716	1.2233053564426487e-05	0.2785714285714286	3.407726993633445e-11	0.4697986577181208	3.083326913427657e-122	0.2214765100671141	7.692033246650709e-22	0.12751677852348994	1.4149885530847107e-05	0.3959731543624161	1.1303105040264826e-34	0.18120805369127516	0.0005719777345410942	0.2953020134228188	6.348282937394379e-14	0.4714285714285714	7.482940114524266e-116	0.40714285714285714	9.526472763656404e-84	0.19285714285714287	8.788010910061364e-15	0.4	1.5970172576509063e-33	0.18571428571428572	0.000433735858476299	0.3142857142857143	1.2436406315264897e-15	0.3143797497641483	1.9041599115391617e-06
0.5637583892617449	4.4947298940899805e-182	0.12080536912751678	7.320141881397595e-05	0.087248322147651	0.036961770292961604	0.3288590604026846	1.725669805646012e-21	0.11409395973154363	0.49470964078869517	0.16778523489932887	0.014445552000323771	0.4	1.6610296283998195e-80	0.20714285714285716	1.4479472210298342e-17	0.11428571428571428	0.0004829296325599227	0.35	7.37504156111877e-24	0.16428571428571428	0.007723522206810517	0.2571428571428571	6.459098634356384e-09	0.6644295302013423	1.629777399466887e-259	0.1476510067114094	4.520955155527115e-08	0.1342281879194631	2.3886392661900456e-06	0.4161073825503356	2.862685438068592e-39	0.1610738255033557	0.008895427398839268	0.2684563758389262	1.2222581908826614e-10	0.5857142857142857	5.762357520191058e-186	0.3142857142857143	1.0967844544143841e-46	0.21428571428571427	4.704432705917689e-19	0.37857142857142856	3.590054996253007e-29	0.24285714285714285	6.713036911594036e-09	0.35	7.094928746546864e-21	1.88943169516496e-05	0.0052944389594137276
0.7583892617449665	0.0	0.15436241610738255	5.063250907499144e-09	0.08053691275167785	0.08721102180172363	0.3087248322147651	3.5658644145891015e-18	0.11409395973154363	0.49470964078869517	0.16778523489932887	0.014445552000323771	0.6	6.64455496842016e-196	0.20714285714285716	1.4479472210298342e-17	0.12142857142857143	0.00010539072760760837	0.4714285714285714	2.6280395187221845e-50	0.21428571428571427	3.1882517675723902e-06	0.29285714285714287	7.141944274929741e-13	0.8456375838926175	0.0	0.18120805369127516	2.0023746501359616e-13	0.1610738255033557	4.940928021060541e-10	0.3959731543624161	1.1303105040264826e-34	0.2348993288590604	1.5680339993404506e-08	0.31543624161073824	1.0516773395116264e-16	0.7357142857142858	2.4778740613643498e-303	0.30714285714285716	2.726629543851634e-44	0.3142857142857143	1.0967844544143841e-46	0.39285714285714285	4.885543096698026e-32	0.21428571428571427	3.1882517675723902e-06	0.35714285714285715	5.072144940083085e-22	3.4454457227462766e-05	0.0706262019854094
0.7248322147651006	0.0	0.12080536912751678	7.320141881397595e-05	0.10067114093959731	0.0045402181742914645	0.2751677852348993	2.6519058246499275e-13	0.06711409395973154	0.21116350737943881	0.12080536912751678	0.5594017094160468	0.6285714285714286	1.4566893910323655e-216	0.22142857142857142	1.317406398888595e-20	0.20714285714285716	1.4479472210298342e-17	0.5142857142857142	4.625238887978621e-62	0.20714285714285716	1.2233053564426487e-05	0.32857142857142857	1.2419781161221051e-17	0.8791946308724832	0.0	0.1342281879194631	2.3886392661900456e-06	0.16778523489932887	4.199606662218595e-11	0.33557046979865773	1.1650739980130419e-22	0.18791946308724833	0.00019864106645199042	0.2550335570469799	3.537855612527513e-09	0.75	0.0	0.22142857142857142	1.317406398888595e-20	0.3	5.836451329347162e-42	0.37857142857142856	3.590054996253007e-29	0.17857142857142858	0.0012217798077723788	0.29285714285714287	7.141944274929741e-13	0.008753811093481117	0.0016600066845243147
[truncated: 11 more columns]
