# Supplementary material for: Frontal eye field and caudate neurons make different contributions to reward-biased perceptual decisions
Source: eLife. 2020 Nov 27;9:e60535. doi: 10.7554/eLife.60535 (PMC7695458; doi:10.7554/eLife.60535)
Supplement: Figure 3—source data 2. [file elife-60535-fig3-data2.csv]

time	Choice_pos	Choice_neg	Rewcont_pos	Rewcont_neg	Rewsize_pos	Rewsize_neg	RTnorm1_pos	RTnorm1_neg	RTnorm2_pos	RTnorm2_neg	RTnormRewSize1_pos	RTnormRewSize1_neg	RTnormRewsize2_pos	RTnormRewsize2_neg
-300	0.0238095238095238	0.0238095238095238	0.0476190476190476	0.0396825396825397	0.0238095238095238	0.0317460317460317	0.0158730158730159	0.0317460317460317	0.0238095238095238	0.0238095238095238	0.0158730158730159	0.0158730158730159	0.0238095238095238	0.0396825396825397
-290	0.0238095238095238	0.0158730158730159	0.0476190476190476	0.0396825396825397	0.0396825396825397	0.0317460317460317	0.0238095238095238	0.0238095238095238	0.0158730158730159	0.0238095238095238	0.0158730158730159	0.0317460317460317	0.0238095238095238	0.0396825396825397
-280	0.0238095238095238	0.0238095238095238	0.0634920634920635	0.0476190476190476	0.0317460317460317	0.0396825396825397	0.0158730158730159	0.0317460317460317	0.0158730158730159	0.0238095238095238	0.0158730158730159	0.0396825396825397	0.0238095238095238	0.0158730158730159
-270	0.0158730158730159	0.0317460317460317	0.0476190476190476	0.0476190476190476	0.0238095238095238	0.0238095238095238	0.0317460317460317	0.0238095238095238	0.0158730158730159	0.0238095238095238	0.0158730158730159	0.0158730158730159	0.0238095238095238	0.0158730158730159
-260	0.0158730158730159	0.0396825396825397	0.0714285714285714	0.0476190476190476	0.0317460317460317	0.00793650793650794	0.0317460317460317	0.0158730158730159	0.0158730158730159	0.0317460317460317	0.00793650793650794	0.0158730158730159	0.0238095238095238	0.0158730158730159
-250	0.0158730158730159	0.0476190476190476	0.0873015873015873	0.0555555555555556	0.0317460317460317	0.0158730158730159	0.0317460317460317	0.0238095238095238	0.0317460317460317	0.0158730158730159	0.0158730158730159	0.0238095238095238	0.0238095238095238	0.0158730158730159
-240	0.0238095238095238	0.0317460317460317	0.0793650793650794	0.0714285714285714	0.0317460317460317	0.0158730158730159	0.0317460317460317	0.0158730158730159	0.0238095238095238	0.0317460317460317	0.00793650793650794	0.0317460317460317	0.0238095238095238	0.0238095238095238
-230	0.00793650793650794	0.0396825396825397	0.0952380952380952	0.0714285714285714	0.0158730158730159	0.0238095238095238	0.0317460317460317	0.0158730158730159	0.0158730158730159	0.0317460317460317	0.00793650793650794	0.0317460317460317	0.0317460317460317	0.0158730158730159
-220	0.00793650793650794	0.0396825396825397	0.0873015873015873	0.0555555555555556	0.0238095238095238	0.0238095238095238	0.0317460317460317	0.0317460317460317	0.0238095238095238	0.0396825396825397	0	0.0396825396825397	0.0238095238095238	0.0158730158730159
-210	0.00793650793650794	0.0476190476190476	0.0952380952380952	0.0555555555555556	0.0158730158730159	0.0158730158730159	0.0476190476190476	0.00793650793650794	0.00793650793650794	0.0396825396825397	0.00793650793650794	0.0317460317460317	0.0238095238095238	0.0158730158730159
-200	0.00793650793650794	0.0317460317460317	0.0634920634920635	0.0476190476190476	0.0317460317460317	0.0158730158730159	0.0238095238095238	0.00793650793650794	0.00793650793650794	0.0396825396825397	0.00793650793650794	0.00793650793650794	0.0317460317460317	0.0158730158730159
-190	0.00793650793650794	0.0317460317460317	0.0634920634920635	0.0317460317460317	0.0238095238095238	0	0.0238095238095238	0.0158730158730159	0.0158730158730159	0.0476190476190476	0.00793650793650794	0.00793650793650794	0.0317460317460317	0.0158730158730159
-180	0.0158730158730159	0.0317460317460317	0.0793650793650794	0.0317460317460317	0.0396825396825397	0.00793650793650794	0.0238095238095238	0.00793650793650794	0.0238095238095238	0.0317460317460317	0.0158730158730159	0.00793650793650794	0.0396825396825397	0.0238095238095238
-170	0.0158730158730159	0.0238095238095238	0.0873015873015873	0.0396825396825397	0.0238095238095238	0	0.0317460317460317	0.0238095238095238	0.0317460317460317	0.0396825396825397	0.00793650793650794	0.0158730158730159	0.0317460317460317	0.0238095238095238
-160	0.0158730158730159	0.0238095238095238	0.0952380952380952	0.0317460317460317	0.0238095238095238	0.00793650793650794	0.0317460317460317	0.0317460317460317	0.0158730158730159	0.0317460317460317	0.00793650793650794	0.0158730158730159	0.0476190476190476	0.0238095238095238
-150	0.0158730158730159	0.0238095238095238	0.0873015873015873	0.0317460317460317	0.0396825396825397	0.00793650793650794	0.0396825396825397	0.0238095238095238	0.0158730158730159	0.0396825396825397	0.0238095238095238	0.0158730158730159	0.0317460317460317	0.00793650793650794
-140	0.0158730158730159	0.0238095238095238	0.111111111111111	0.00793650793650794	0.0238095238095238	0.00793650793650794	0.0317460317460317	0.0238095238095238	0.0158730158730159	0.0238095238095238	0.0317460317460317	0.0158730158730159	0.0238095238095238	0.0317460317460317
-130	0.0158730158730159	0.0158730158730159	0.0714285714285714	0.0158730158730159	0.0317460317460317	0.0158730158730159	0.0238095238095238	0.0317460317460317	0.0317460317460317	0.0238095238095238	0.0158730158730159	0.00793650793650794	0.0158730158730159	0.0158730158730159
-120	0.0238095238095238	0.0238095238095238	0.0793650793650794	0.0396825396825397	0.0317460317460317	0.0317460317460317	0.0158730158730159	0.00793650793650794	0.0238095238095238	0.0158730158730159	0.0238095238095238	0.00793650793650794	0.0238095238095238	0.0238095238095238
-110	0.0238095238095238	0.0317460317460317	0.0793650793650794	0.0238095238095238	0.0396825396825397	0.0317460317460317	0.0158730158730159	0.0158730158730159	0.0317460317460317	0.0158730158730159	0.00793650793650794	0.0158730158730159	0.00793650793650794	0.0158730158730159
-100	0.0158730158730159	0.0238095238095238	0.0634920634920635	0.0158730158730159	0.0238095238095238	0.0238095238095238	0.0238095238095238	0.00793650793650794	0.0238095238095238	0.0238095238095238	0.0238095238095238	0.0158730158730159	0	0.00793650793650794
-90	0.0238095238095238	0.0238095238095238	0.0793650793650794	0.00793650793650794	0.0158730158730159	0.0158730158730159	0.0317460317460317	0.00793650793650794	0.0158730158730159	0.0158730158730159	0.0158730158730159	0.0158730158730159	0	0
-80	0.0238095238095238	0.0238095238095238	0.0634920634920635	0.0158730158730159	0.00793650793650794	0.0158730158730159	0.0238095238095238	0.00793650793650794	0.0158730158730159	0.0238095238095238	0.0238095238095238	0.00793650793650794	0	0.0238095238095238
-70	0.0238095238095238	0.0158730158730159	0.0555555555555556	0.0317460317460317	0.00793650793650794	0.0158730158730159	0.0238095238095238	0.00793650793650794	0.0158730158730159	0.00793650793650794	0.0158730158730159	0.00793650793650794	0	0.0158730158730159
-60	0.0238095238095238	0.0158730158730159	0.0873015873015873	0.0476190476190476	0.0158730158730159	0.0238095238095238	0.0238095238095238	0.00793650793650794	0.0238095238095238	0.0158730158730159	0.00793650793650794	0.00793650793650794	0	0.00793650793650794
-50	0.0317460317460317	0.0317460317460317	0.0873015873015873	0.0476190476190476	0.0238095238095238	0.0158730158730159	0.0317460317460317	0.00793650793650794	0.0158730158730159	0.00793650793650794	0.0158730158730159	0.0158730158730159	0.00793650793650794	0.00793650793650794
-40	0.0317460317460317	0.0317460317460317	0.0714285714285714	0.0555555555555556	0.0396825396825397	0.0238095238095238	0.0317460317460317	0.00793650793650794	0.0317460317460317	0.0158730158730159	0.0158730158730159	0.0158730158730159	0.0158730158730159	0.00793650793650794
-30	0.0396825396825397	0.0317460317460317	0.0793650793650794	0.0555555555555556	0.0238095238095238	0.0317460317460317	0.0317460317460317	0.0238095238095238	0.0158730158730159	0.00793650793650794	0.0158730158730159	0.0238095238095238	0.00793650793650794	0.0158730158730159
-20	0.0238095238095238	0.0396825396825397	0.0714285714285714	0.0476190476190476	0.0238095238095238	0.0158730158730159	0.0476190476190476	0.0158730158730159	0.0238095238095238	0.0238095238095238	0.0317460317460317	0.0158730158730159	0.00793650793650794	0.00793650793650794
-10	0.0238095238095238	0.0317460317460317	0.0873015873015873	0.0555555555555556	0.0238095238095238	0.0158730158730159	0.0317460317460317	0.0158730158730159	0.0238095238095238	0.0238095238095238	0.0238095238095238	0.0158730158730159	0.00793650793650794	0.00793650793650794
0	0.0396825396825397	0.0476190476190476	0.0873015873015873	0.0476190476190476	0.0238095238095238	0.0158730158730159	0.0158730158730159	0	0.0317460317460317	0.0158730158730159	0.0158730158730159	0.0158730158730159	0.00793650793650794	0.0158730158730159
10	0.0158730158730159	0.0238095238095238	0.0952380952380952	0.0396825396825397	0.0238095238095238	0.00793650793650794	0.0238095238095238	0.0317460317460317	0.0555555555555556	0.00793650793650794	0.0238095238095238	0.0158730158730159	0	0.0238095238095238
20	0.0238095238095238	0.0238095238095238	0.111111111111111	0.0238095238095238	0.0317460317460317	0.0317460317460317	0.0158730158730159	0.0317460317460317	0.0317460317460317	0.00793650793650794	0.0238095238095238	0.0238095238095238	0	0.0317460317460317
30	0.0238095238095238	0.0317460317460317	0.119047619047619	0.0238095238095238	0.0396825396825397	0.0238095238095238	0.0317460317460317	0.0238095238095238	0.0238095238095238	0.0158730158730159	0.0238095238095238	0.0317460317460317	0	0.0317460317460317
40	0.0238095238095238	0.0238095238095238	0.126984126984127	0.0238095238095238	0.0158730158730159	0.00793650793650794	0.0317460317460317	0.0317460317460317	0.0396825396825397	0.00793650793650794	0.0476190476190476	0.0476190476190476	0.0158730158730159	0.0158730158730159
50	0.0396825396825397	0.0317460317460317	0.126984126984127	0.0317460317460317	0.0396825396825397	0.0158730158730159	0.0396825396825397	0.0396825396825397	0.0238095238095238	0.0158730158730159	0.0238095238095238	0.0396825396825397	0.00793650793650794	0.0396825396825397
60	0.0396825396825397	0.0476190476190476	0.126984126984127	0.0317460317460317	0.0396825396825397	0.0238095238095238	0.0396825396825397	0.0317460317460317	0.0317460317460317	0.0158730158730159	0.0238095238095238	0.0476190476190476	0.00793650793650794	0.0238095238095238
70	0.0238095238095238	0.0396825396825397	0.126984126984127	0.0238095238095238	0.0555555555555556	0.0317460317460317	0.0158730158730159	0.0317460317460317	0.0158730158730159	0.0158730158730159	0.00793650793650794	0.0555555555555556	0.00793650793650794	0.0238095238095238
80	0.0317460317460317	0.0634920634920635	0.150793650793651	0.0317460317460317	0.0396825396825397	0.0317460317460317	0.00793650793650794	0.0317460317460317	0.0476190476190476	0.0158730158730159	0.0238095238095238	0.0476190476190476	0.0158730158730159	0.0238095238095238
90	0.0396825396825397	0.0396825396825397	0.166666666666667	0.0158730158730159	0.0396825396825397	0.0476190476190476	0.0158730158730159	0.0396825396825397	0.0396825396825397	0.0238095238095238	0.0158730158730159	0.0476190476190476	0.0158730158730159	0.0238095238095238
100	0.0555555555555556	0.0634920634920635	0.134920634920635	0.0396825396825397	0.0396825396825397	0.0476190476190476	0.0238095238095238	0.0158730158730159	0.0317460317460317	0.0238095238095238	0.0158730158730159	0.0396825396825397	0.00793650793650794	0.0238095238095238
110	0.0476190476190476	0.0714285714285714	0.174603174603175	0.0317460317460317	0.0476190476190476	0.0317460317460317	0.0238095238095238	0.0238095238095238	0.0238095238095238	0.0317460317460317	0.0158730158730159	0.0555555555555556	0.0238095238095238	0.0238095238095238
120	0.0317460317460317	0.0555555555555556	0.158730158730159	0.0714285714285714	0.0396825396825397	0.0396825396825397	0.0238095238095238	0.0238095238095238	0.0238095238095238	0.0396825396825397	0.0317460317460317	0.0238095238095238	0.0238095238095238	0.0238095238095238
130	0.0396825396825397	0.0476190476190476	0.166666666666667	0.0793650793650794	0.0396825396825397	0.0396825396825397	0.0238095238095238	0.00793650793650794	0.0317460317460317	0.0317460317460317	0.0317460317460317	0.0317460317460317	0.0317460317460317	0.0238095238095238
140	0.0238095238095238	0.0396825396825397	0.174603174603175	0.0714285714285714	0.0317460317460317	0.0396825396825397	0.0238095238095238	0.0238095238095238	0.0476190476190476	0.0238095238095238	0.0396825396825397	0.0396825396825397	0.0317460317460317	0.0238095238095238
150	0.0317460317460317	0.0317460317460317	0.174603174603175	0.0396825396825397	0.0238095238095238	0.0238095238095238	0.0238095238095238	0.00793650793650794	0.0238095238095238	0.0317460317460317	0.0396825396825397	0.0476190476190476	0.0317460317460317	0.0158730158730159
160	0.0317460317460317	0.0238095238095238	0.174603174603175	0.0396825396825397	0.0238095238095238	0.0476190476190476	0.0158730158730159	0.0158730158730159	0.0158730158730159	0.0317460317460317	0.0238095238095238	0.0317460317460317	0.0317460317460317	0.0238095238095238
170	0.0396825396825397	0.00793650793650794	0.182539682539683	0.0317460317460317	0.0238095238095238	0.0317460317460317	0.0396825396825397	0	0.00793650793650794	0.0317460317460317	0.0158730158730159	0.0476190476190476	0.0238095238095238	0.0158730158730159
180	0.0476190476190476	0.00793650793650794	0.166666666666667	0.0634920634920635	0.0238095238095238	0.0158730158730159	0.0317460317460317	0.0238095238095238	0.0238095238095238	0.0476190476190476	0.0238095238095238	0.0317460317460317	0.0238095238095238	0.0158730158730159
190	0.0396825396825397	0.0158730158730159	0.166666666666667	0.0634920634920635	0.0238095238095238	0.0238095238095238	0.0317460317460317	0.0238095238095238	0.0476190476190476	0.0317460317460317	0.0158730158730159	0.0634920634920635	0.0238095238095238	0.0158730158730159
200	0.0555555555555556	0.0158730158730159	0.166666666666667	0.0634920634920635	0.0238095238095238	0.0238095238095238	0.00793650793650794	0.0476190476190476	0.0396825396825397	0.0476190476190476	0.0238095238095238	0.0317460317460317	0.0238095238095238	0.0158730158730159
210	0.0476190476190476	0.00793650793650794	0.150793650793651	0.0476190476190476	0.0158730158730159	0.0238095238095238	0.0238095238095238	0.0317460317460317	0.0396825396825397	0.0238095238095238	0.0396825396825397	0.0238095238095238	0.0158730158730159	0.0158730158730159
220	0.0396825396825397	0.0158730158730159	0.158730158730159	0.0317460317460317	0.0158730158730159	0.0158730158730159	0	0.0555555555555556	0.0317460317460317	0.0238095238095238	0.0317460317460317	0.0238095238095238	0.0158730158730159	0.0158730158730159
230	0.0555555555555556	0.0158730158730159	0.150793650793651	0.0317460317460317	0.0158730158730159	0.00793650793650794	0.00793650793650794	0.0396825396825397	0.0317460317460317	0.0238095238095238	0.0317460317460317	0.0396825396825397	0	0.0238095238095238
240	0.0317460317460317	0.00793650793650794	0.150793650793651	0.0317460317460317	0.0238095238095238	0.0158730158730159	0.0158730158730159	0.0476190476190476	0.00793650793650794	0.0238095238095238	0.0317460317460317	0.0238095238095238	0	0.0238095238095238
250	0.0317460317460317	0.00793650793650794	0.134920634920635	0.0317460317460317	0.0317460317460317	0.00793650793650794	0.0158730158730159	0.0555555555555556	0.0158730158730159	0.0396825396825397	0.0238095238095238	0.00793650793650794	0.00793650793650794	0.00793650793650794
260	0.0396825396825397	0.00793650793650794	0.158730158730159	0.0317460317460317	0.0158730158730159	0.0158730158730159	0.0238095238095238	0.0555555555555556	0.0158730158730159	0.0396825396825397	0.0238095238095238	0	0.0158730158730159	0.00793650793650794
270	0.0555555555555556	0.00793650793650794	0.134920634920635	0.0396825396825397	0.0238095238095238	0.0238095238095238	0.0238095238095238	0.0317460317460317	0.0317460317460317	0.0317460317460317	0.0317460317460317	0.0158730158730159	0.00793650793650794	0.00793650793650794
280	0.0238095238095238	0	0.142857142857143	0.0317460317460317	0.0317460317460317	0.0317460317460317	0.0238095238095238	0.0158730158730159	0.0158730158730159	0.0317460317460317	0.0238095238095238	0.0158730158730159	0.0238095238095238	0.00793650793650794
290	0.0317460317460317	0	0.142857142857143	0.0317460317460317	0.0238095238095238	0.0238095238095238	0.0238095238095238	0.00793650793650794	0.0158730158730159	0.0238095238095238	0.0238095238095238	0.0238095238095238	0.0158730158730159	0.00793650793650794
300	0.0317460317460317	0	0.119047619047619	0.0396825396825397	0.0396825396825397	0.0317460317460317	0.0158730158730159	0.0158730158730159	0.0158730158730159	0.0238095238095238	0.0317460317460317	0.0238095238095238	0	0.00793650793650794
310	0.0238095238095238	0.00793650793650794	0.119047619047619	0.0634920634920635	0.0317460317460317	0.0396825396825397	0.0158730158730159	0.0238095238095238	0.0238095238095238	0.0238095238095238	0.0238095238095238	0.0158730158730159	0.0158730158730159	0.00793650793650794
320	0.0317460317460317	0.00793650793650794	0.134920634920635	0.0396825396825397	0.0238095238095238	0.0476190476190476	0.0158730158730159	0.0238095238095238	0.0317460317460317	0.0317460317460317	0.0238095238095238	0.0158730158730159	0	0.0158730158730159
330	0.0238095238095238	0.0158730158730159	0.134920634920635	0.0476190476190476	0.0317460317460317	0.0396825396825397	0.0158730158730159	0.0238095238095238	0.0317460317460317	0.0317460317460317	0.0238095238095238	0.0238095238095238	0.0158730158730159	0.0158730158730159
340	0.0238095238095238	0.00793650793650794	0.142857142857143	0.0476190476190476	0.0238095238095238	0.0317460317460317	0.0317460317460317	0.0238095238095238	0.0238095238095238	0.0396825396825397	0.0158730158730159	0.0158730158730159	0.00793650793650794	0.0238095238095238
350	0.0238095238095238	0.0158730158730159	0.134920634920635	0.0396825396825397	0.0317460317460317	0.0317460317460317	0.0238095238095238	0.00793650793650794	0.0317460317460317	0.0396825396825397	0.00793650793650794	0.0238095238095238	0.0158730158730159	0.0158730158730159
360	0.0238095238095238	0.00793650793650794	0.150793650793651	0.0396825396825397	0.0476190476190476	0.0476190476190476	0.0476190476190476	0.0238095238095238	0.0396825396825397	0.0317460317460317	0.0238095238095238	0.0238095238095238	0.00793650793650794	0.00793650793650794
370	0.0396825396825397	0	0.103174603174603	0.0238095238095238	0.0396825396825397	0.0396825396825397	0.0476190476190476	0.0238095238095238	0.0317460317460317	0.0238095238095238	0.00793650793650794	0.0238095238095238	0.0238095238095238	0.00793650793650794
380	0.0476190476190476	0.0158730158730159	0.111111111111111	0.0238095238095238	0.0476190476190476	0.0396825396825397	0.0476190476190476	0.0238095238095238	0.0238095238095238	0.0396825396825397	0.0238095238095238	0.0238095238095238	0.0158730158730159	0.00793650793650794
390	0.0396825396825397	0.00793650793650794	0.134920634920635	0.0317460317460317	0.0396825396825397	0.0476190476190476	0.0396825396825397	0.0317460317460317	0.0396825396825397	0.0317460317460317	0.0238095238095238	0.0476190476190476	0.0158730158730159	0.00793650793650794
400	0.0634920634920635	0.00793650793650794	0.126984126984127	0.0317460317460317	0.0317460317460317	0.0476190476190476	0.0476190476190476	0.0317460317460317	0.0396825396825397	0.0317460317460317	0.0396825396825397	0.0396825396825397	0.0238095238095238	0.0158730158730159
410	0.0555555555555556	0.00793650793650794	0.134920634920635	0.0396825396825397	0.0396825396825397	0.0317460317460317	0.0476190476190476	0.0317460317460317	0.0238095238095238	0.0317460317460317	0.0238095238095238	0.0396825396825397	0.0396825396825397	0.0158730158730159
420	0.0634920634920635	0.00793650793650794	0.126984126984127	0.0396825396825397	0.0317460317460317	0.0396825396825397	0.0317460317460317	0.0317460317460317	0.0317460317460317	0.0238095238095238	0.0238095238095238	0.0317460317460317	0.0238095238095238	0.00793650793650794
430	0.0793650793650794	0.0238095238095238	0.119047619047619	0.0238095238095238	0.0317460317460317	0.0158730158730159	0.0476190476190476	0.0396825396825397	0.0396825396825397	0.0238095238095238	0.00793650793650794	0.0317460317460317	0.0317460317460317	0.00793650793650794
440	0.0714285714285714	0.00793650793650794	0.142857142857143	0.0317460317460317	0.0396825396825397	0.0396825396825397	0.0476190476190476	0.0396825396825397	0.0396825396825397	0.0317460317460317	0.0238095238095238	0.0158730158730159	0.0317460317460317	0.0158730158730159
450	NaN	NaN	NaN	NaN	NaN	NaN	NaN	NaN	NaN	NaN	NaN	NaN	NaN	NaN
