# Supplementary material for: Frontal eye field and caudate neurons make different contributions to reward-biased perceptual decisions
Source: eLife. 2020 Nov 27;9:e60535. doi: 10.7554/eLife.60535 (PMC7695458; doi:10.7554/eLife.60535)
Supplement: Figure 3—source data 3. [file elife-60535-fig3-data3.csv]

time	Choice_pos	Choice_neg	Rewcont_pos	Rewcont_neg	Rewsize_pos	Rewsize_neg	RTnorm1_pos	RTnorm1_neg	RTnorm2_pos	RTnorm2_neg	RTnormRewSize1_pos	RTnormRewSize1_neg	RTnormRewsize2_pos	RTnormRewsize2_neg
-300	0.0147058823529412	0.0294117647058824	0.0514705882352941	0.0661764705882353	0.0367647058823529	0.0514705882352941	0.0367647058823529	0.0294117647058824	0.0441176470588235	0.0147058823529412	0.0441176470588235	0.0220588235294118	0.0367647058823529	0.00735294117647059
-290	0.0147058823529412	0.0294117647058824	0.0735294117647059	0.0735294117647059	0.0220588235294118	0.0367647058823529	0.0220588235294118	0.0367647058823529	0.0441176470588235	0.0147058823529412	0.0367647058823529	0.0294117647058824	0.0220588235294118	0.0220588235294118
-280	0	0.0367647058823529	0.0588235294117647	0.0735294117647059	0.0367647058823529	0.0294117647058824	0.0147058823529412	0.0367647058823529	0.0514705882352941	0.0147058823529412	0.0220588235294118	0.0514705882352941	0.0147058823529412	0.0147058823529412
-270	0.0367647058823529	0.0294117647058824	0.0661764705882353	0.0661764705882353	0.0367647058823529	0.0514705882352941	0.0147058823529412	0.0294117647058824	0.0441176470588235	0.00735294117647059	0.0294117647058824	0.0294117647058824	0.0220588235294118	0.00735294117647059
-260	0.00735294117647059	0.0294117647058824	0.0735294117647059	0.0808823529411765	0.0514705882352941	0.0441176470588235	0.0147058823529412	0.0367647058823529	0.0514705882352941	0.00735294117647059	0.0294117647058824	0.0294117647058824	0.0147058823529412	0.0147058823529412
-250	0	0.0220588235294118	0.0661764705882353	0.0735294117647059	0.0514705882352941	0.0441176470588235	0.0147058823529412	0.0294117647058824	0.0514705882352941	0.0220588235294118	0.0294117647058824	0.0367647058823529	0.0294117647058824	0.00735294117647059
-240	0.0147058823529412	0.0220588235294118	0.0514705882352941	0.0588235294117647	0.0514705882352941	0.0441176470588235	0.0220588235294118	0.0220588235294118	0.0367647058823529	0.0294117647058824	0.0367647058823529	0.0220588235294118	0.0367647058823529	0
-230	0.0367647058823529	0.0147058823529412	0.0514705882352941	0.0588235294117647	0.0514705882352941	0.0514705882352941	0.0147058823529412	0.0147058823529412	0.0367647058823529	0.0220588235294118	0.0220588235294118	0.0294117647058824	0.0220588235294118	0
-220	0.0220588235294118	0.0294117647058824	0.0514705882352941	0.0588235294117647	0.0514705882352941	0.0588235294117647	0.0294117647058824	0.0147058823529412	0.0220588235294118	0.0147058823529412	0.0220588235294118	0.0220588235294118	0.0220588235294118	0
-210	0.0367647058823529	0.0367647058823529	0.0735294117647059	0.0514705882352941	0.0514705882352941	0.0441176470588235	0.0367647058823529	0.0220588235294118	0.0220588235294118	0.0220588235294118	0.0220588235294118	0.0294117647058824	0.0220588235294118	0.0147058823529412
-200	0.0220588235294118	0.0220588235294118	0.0441176470588235	0.0588235294117647	0.0367647058823529	0.0441176470588235	0.0441176470588235	0.0147058823529412	0.00735294117647059	0.0220588235294118	0.0147058823529412	0.0294117647058824	0.0220588235294118	0.0220588235294118
-190	0.0220588235294118	0.0220588235294118	0.0514705882352941	0.0735294117647059	0.0220588235294118	0.0514705882352941	0.0367647058823529	0.0147058823529412	0.0147058823529412	0.0220588235294118	0.0147058823529412	0.0294117647058824	0.0220588235294118	0.0147058823529412
-180	0.0294117647058824	0.0294117647058824	0.0441176470588235	0.0588235294117647	0.0367647058823529	0.0367647058823529	0.0367647058823529	0.0147058823529412	0.0220588235294118	0.0147058823529412	0.0147058823529412	0.0220588235294118	0.0294117647058824	0.0220588235294118
-170	0.0147058823529412	0.0294117647058824	0.0514705882352941	0.0588235294117647	0.0220588235294118	0.0294117647058824	0.0367647058823529	0.0147058823529412	0.0220588235294118	0.00735294117647059	0.00735294117647059	0.0514705882352941	0.0294117647058824	0.0147058823529412
-160	0.00735294117647059	0.0367647058823529	0.0588235294117647	0.0588235294117647	0.0294117647058824	0.0294117647058824	0.0220588235294118	0.0367647058823529	0.0147058823529412	0.0367647058823529	0	0.0294117647058824	0.0367647058823529	0.0147058823529412
-150	0.00735294117647059	0.0220588235294118	0.0441176470588235	0.0588235294117647	0.0220588235294118	0.0367647058823529	0.0294117647058824	0.0147058823529412	0.0220588235294118	0.0147058823529412	0	0.0294117647058824	0.0367647058823529	0.0220588235294118
-140	0.0147058823529412	0.0147058823529412	0.0514705882352941	0.0661764705882353	0.0220588235294118	0.0441176470588235	0.0294117647058824	0.0147058823529412	0.0367647058823529	0.0147058823529412	0	0.0220588235294118	0.0441176470588235	0.0294117647058824
-130	0.0147058823529412	0.0220588235294118	0.0882352941176471	0.0661764705882353	0.0220588235294118	0.0367647058823529	0.0441176470588235	0.00735294117647059	0.0294117647058824	0.00735294117647059	0.0220588235294118	0.0294117647058824	0.0367647058823529	0.0147058823529412
-120	0.0220588235294118	0.0220588235294118	0.0735294117647059	0.0661764705882353	0.0220588235294118	0.0367647058823529	0.0220588235294118	0.0220588235294118	0.0294117647058824	0.00735294117647059	0.00735294117647059	0.0220588235294118	0.0367647058823529	0.0147058823529412
-110	0.0220588235294118	0.0147058823529412	0.0661764705882353	0.0588235294117647	0.0220588235294118	0.0367647058823529	0.0294117647058824	0.0147058823529412	0.0441176470588235	0.0147058823529412	0	0.0220588235294118	0.0147058823529412	0.0220588235294118
-100	0.0147058823529412	0.0220588235294118	0.0588235294117647	0.0514705882352941	0.0294117647058824	0.0441176470588235	0.0514705882352941	0.0294117647058824	0.0514705882352941	0	0	0.0220588235294118	0.0367647058823529	0.0220588235294118
-90	0.0147058823529412	0.0294117647058824	0.0735294117647059	0.0588235294117647	0.0294117647058824	0.0441176470588235	0.0661764705882353	0.0294117647058824	0.0441176470588235	0.00735294117647059	0.00735294117647059	0.0294117647058824	0.0367647058823529	0.0147058823529412
-80	0.0147058823529412	0.0220588235294118	0.0661764705882353	0.0441176470588235	0.0220588235294118	0.0367647058823529	0.0367647058823529	0.0294117647058824	0.0294117647058824	0.00735294117647059	0.0147058823529412	0.0441176470588235	0.0294117647058824	0.0294117647058824
-70	0.0220588235294118	0.0220588235294118	0.0955882352941176	0.0514705882352941	0.0147058823529412	0.00735294117647059	0.0294117647058824	0.0367647058823529	0.0294117647058824	0.00735294117647059	0.00735294117647059	0.0367647058823529	0.0220588235294118	0.0147058823529412
-60	0.0220588235294118	0.00735294117647059	0.110294117647059	0.0514705882352941	0.0147058823529412	0.00735294117647059	0.0588235294117647	0.0441176470588235	0.0220588235294118	0.00735294117647059	0.00735294117647059	0.0220588235294118	0.0367647058823529	0
-50	0.0147058823529412	0.00735294117647059	0.125	0.0588235294117647	0.00735294117647059	0.0147058823529412	0.0441176470588235	0.0441176470588235	0.0367647058823529	0.00735294117647059	0.0147058823529412	0.0441176470588235	0.0294117647058824	0
-40	0.0220588235294118	0.0220588235294118	0.0955882352941176	0.0514705882352941	0.0147058823529412	0.0220588235294118	0.0441176470588235	0.0294117647058824	0.0147058823529412	0.00735294117647059	0.0367647058823529	0.0514705882352941	0.0147058823529412	0.00735294117647059
-30	0	0.0294117647058824	0.110294117647059	0.0514705882352941	0.00735294117647059	0.00735294117647059	0.0367647058823529	0.0294117647058824	0.0220588235294118	0.00735294117647059	0.0220588235294118	0.0441176470588235	0.0220588235294118	0.00735294117647059
-20	0.00735294117647059	0.0147058823529412	0.117647058823529	0.0514705882352941	0.00735294117647059	0.0147058823529412	0.0588235294117647	0.0294117647058824	0.0147058823529412	0.00735294117647059	0.0220588235294118	0.0514705882352941	0.0220588235294118	0.00735294117647059
-10	0.0220588235294118	0.0147058823529412	0.110294117647059	0.0514705882352941	0.00735294117647059	0.0147058823529412	0.0441176470588235	0.0294117647058824	0.00735294117647059	0.0294117647058824	0.0220588235294118	0.0367647058823529	0.0294117647058824	0.0220588235294118
0	0.0220588235294118	0.0147058823529412	0.110294117647059	0.0661764705882353	0.0147058823529412	0.0294117647058824	0.0661764705882353	0.0441176470588235	0.0294117647058824	0.00735294117647059	0.0220588235294118	0.0441176470588235	0.0147058823529412	0.0220588235294118
10	0.00735294117647059	0.0294117647058824	0.0882352941176471	0.0735294117647059	0.0220588235294118	0.0367647058823529	0.0588235294117647	0.0441176470588235	0.0367647058823529	0.00735294117647059	0.0147058823529412	0.0588235294117647	0.0441176470588235	0.0220588235294118
20	0.00735294117647059	0.0220588235294118	0.0882352941176471	0.0882352941176471	0.0220588235294118	0.0294117647058824	0.0588235294117647	0.0441176470588235	0.0294117647058824	0.0147058823529412	0.00735294117647059	0.0441176470588235	0.0441176470588235	0.0147058823529412
30	0.00735294117647059	0.0220588235294118	0.102941176470588	0.0514705882352941	0.0147058823529412	0.0367647058823529	0.0514705882352941	0.0441176470588235	0.00735294117647059	0.00735294117647059	0.0220588235294118	0.0735294117647059	0.0294117647058824	0.0220588235294118
40	0.0147058823529412	0.0367647058823529	0.102941176470588	0.0661764705882353	0.0147058823529412	0.0441176470588235	0.0441176470588235	0.0441176470588235	0.0147058823529412	0.0147058823529412	0.0147058823529412	0.0441176470588235	0.0147058823529412	0.0441176470588235
50	0.0367647058823529	0.0294117647058824	0.0882352941176471	0.0441176470588235	0.0220588235294118	0.0441176470588235	0.0220588235294118	0.0367647058823529	0.0147058823529412	0.0147058823529412	0.0220588235294118	0.0367647058823529	0.0441176470588235	0.0220588235294118
60	0.0220588235294118	0.0220588235294118	0.102941176470588	0.0588235294117647	0.0220588235294118	0.0441176470588235	0.0367647058823529	0.0294117647058824	0.0294117647058824	0.0147058823529412	0.0367647058823529	0.0441176470588235	0.0588235294117647	0.0220588235294118
70	0.0441176470588235	0.0367647058823529	0.0735294117647059	0.0514705882352941	0.0441176470588235	0.0294117647058824	0.0441176470588235	0.0514705882352941	0.0294117647058824	0.0441176470588235	0.0294117647058824	0.0514705882352941	0.0588235294117647	0.0367647058823529
80	0.0294117647058824	0.0294117647058824	0.0808823529411765	0.0661764705882353	0.0367647058823529	0.0220588235294118	0.0441176470588235	0.0588235294117647	0.0367647058823529	0.0441176470588235	0.0441176470588235	0.0588235294117647	0.0514705882352941	0.0294117647058824
90	0.0220588235294118	0.0367647058823529	0.0882352941176471	0.0514705882352941	0.0367647058823529	0.0294117647058824	0.0294117647058824	0.0441176470588235	0.0367647058823529	0.0367647058823529	0.0367647058823529	0.0514705882352941	0.0441176470588235	0.0294117647058824
100	0.0367647058823529	0.0294117647058824	0.0882352941176471	0.0588235294117647	0.0514705882352941	0.0294117647058824	0.0220588235294118	0.0367647058823529	0.0294117647058824	0.0367647058823529	0.0367647058823529	0.0588235294117647	0.0367647058823529	0.0220588235294118
110	0.0147058823529412	0.0441176470588235	0.0955882352941176	0.0661764705882353	0.0661764705882353	0.0220588235294118	0.0294117647058824	0.0220588235294118	0.0294117647058824	0.0294117647058824	0.0294117647058824	0.0367647058823529	0.0367647058823529	0.0294117647058824
120	0.0220588235294118	0.0441176470588235	0.0882352941176471	0.0514705882352941	0.0588235294117647	0.0367647058823529	0.0294117647058824	0.0441176470588235	0.0294117647058824	0.0294117647058824	0.0220588235294118	0.0294117647058824	0.0294117647058824	0.0220588235294118
130	0.0220588235294118	0.0220588235294118	0.0882352941176471	0.0514705882352941	0.0367647058823529	0.0220588235294118	0.0147058823529412	0.0588235294117647	0.0294117647058824	0.0367647058823529	0.0220588235294118	0.0220588235294118	0.0220588235294118	0.00735294117647059
140	0.0220588235294118	0.0441176470588235	0.132352941176471	0.0514705882352941	0.0294117647058824	0.0294117647058824	0.00735294117647059	0.0367647058823529	0.0220588235294118	0.0367647058823529	0.0220588235294118	0.0147058823529412	0.0294117647058824	0.00735294117647059
150	0.0147058823529412	0.0367647058823529	0.139705882352941	0.0735294117647059	0.0441176470588235	0.0367647058823529	0.0147058823529412	0.0367647058823529	0.0367647058823529	0.0367647058823529	0.0220588235294118	0.0220588235294118	0.0367647058823529	0.00735294117647059
160	0.00735294117647059	0.0147058823529412	0.117647058823529	0.0588235294117647	0.0220588235294118	0.0367647058823529	0.0147058823529412	0.0220588235294118	0.0147058823529412	0.0220588235294118	0.0367647058823529	0	0.0220588235294118	0.00735294117647059
170	0	0.0147058823529412	0.117647058823529	0.0588235294117647	0.0367647058823529	0.0367647058823529	0.0294117647058824	0.0147058823529412	0.0220588235294118	0.00735294117647059	0.0367647058823529	0	0.0147058823529412	0.00735294117647059
180	0	0.00735294117647059	0.125	0.0661764705882353	0.0441176470588235	0.0220588235294118	0.0294117647058824	0.0220588235294118	0.0294117647058824	0.0147058823529412	0.0367647058823529	0.0147058823529412	0.0147058823529412	0.00735294117647059
190	0.00735294117647059	0.00735294117647059	0.125	0.0735294117647059	0.0588235294117647	0.0367647058823529	0.0367647058823529	0.0147058823529412	0.0294117647058824	0.0147058823529412	0.0220588235294118	0.0147058823529412	0.0514705882352941	0.00735294117647059
200	0.0147058823529412	0.0147058823529412	0.117647058823529	0.0882352941176471	0.0441176470588235	0.0367647058823529	0.0514705882352941	0.0147058823529412	0.0220588235294118	0.0147058823529412	0.0294117647058824	0.0147058823529412	0.0367647058823529	0.00735294117647059
210	0.0294117647058824	0.0220588235294118	0.125	0.0882352941176471	0.0367647058823529	0.0294117647058824	0.0294117647058824	0.0147058823529412	0.0367647058823529	0.0220588235294118	0.00735294117647059	0.00735294117647059	0.0294117647058824	0.00735294117647059
220	0.00735294117647059	0.0220588235294118	0.110294117647059	0.0661764705882353	0.0441176470588235	0.0294117647058824	0.0294117647058824	0.0294117647058824	0.0367647058823529	0.0220588235294118	0.0367647058823529	0.00735294117647059	0.0367647058823529	0.0147058823529412
230	0.0147058823529412	0.0220588235294118	0.125	0.0514705882352941	0.0294117647058824	0.0588235294117647	0.0220588235294118	0.0220588235294118	0.0294117647058824	0.0220588235294118	0.0514705882352941	0.0220588235294118	0.0367647058823529	0.0220588235294118
240	0.0220588235294118	0.0147058823529412	0.125	0.0514705882352941	0.0294117647058824	0.0588235294117647	0.0294117647058824	0.0367647058823529	0.0441176470588235	0.0294117647058824	0.0367647058823529	0.0147058823529412	0.0294117647058824	0.0367647058823529
250	0.0367647058823529	0.0294117647058824	0.125	0.0441176470588235	0.0220588235294118	0.0514705882352941	0.0220588235294118	0.0220588235294118	0.0367647058823529	0.0147058823529412	0.0294117647058824	0.0294117647058824	0.0367647058823529	0.0441176470588235
260	0.0294117647058824	0.00735294117647059	0.161764705882353	0.0661764705882353	0.0294117647058824	0.0147058823529412	0.0367647058823529	0.0441176470588235	0.0367647058823529	0.0220588235294118	0.0147058823529412	0.0367647058823529	0.0367647058823529	0.0147058823529412
270	0.0220588235294118	0.0147058823529412	0.154411764705882	0.0588235294117647	0.0147058823529412	0.0220588235294118	0.0294117647058824	0.0294117647058824	0.0220588235294118	0.0367647058823529	0.0147058823529412	0.0367647058823529	0.0294117647058824	0.0220588235294118
280	0.0367647058823529	0.00735294117647059	0.161764705882353	0.0588235294117647	0.0294117647058824	0.0367647058823529	0.0441176470588235	0.0220588235294118	0.0220588235294118	0.0147058823529412	0.0220588235294118	0.0367647058823529	0.0147058823529412	0.0294117647058824
290	0.0367647058823529	0.00735294117647059	0.125	0.0588235294117647	0.0220588235294118	0.0294117647058824	0.0588235294117647	0.0367647058823529	0.0294117647058824	0.0147058823529412	0.0147058823529412	0.0441176470588235	0.0220588235294118	0.0220588235294118
300	0.0147058823529412	0.0220588235294118	0.117647058823529	0.0514705882352941	0.0147058823529412	0.0294117647058824	0.0441176470588235	0.0220588235294118	0.0147058823529412	0.0147058823529412	0.0294117647058824	0.0294117647058824	0.0147058823529412	0.0294117647058824
310	0.0220588235294118	0.0294117647058824	0.132352941176471	0.0514705882352941	0.00735294117647059	0.0294117647058824	0.0514705882352941	0.0220588235294118	0.0294117647058824	0.0147058823529412	0.0220588235294118	0.0367647058823529	0.0367647058823529	0.0220588235294118
320	0.0294117647058824	0.0294117647058824	0.125	0.0588235294117647	0.0220588235294118	0.0294117647058824	0.0441176470588235	0.0220588235294118	0.0367647058823529	0.0147058823529412	0.00735294117647059	0.0367647058823529	0.0441176470588235	0.0220588235294118
330	0.0441176470588235	0.0220588235294118	0.147058823529412	0.0661764705882353	0.0220588235294118	0.0294117647058824	0.0441176470588235	0.0220588235294118	0.0441176470588235	0.0147058823529412	0.00735294117647059	0.0441176470588235	0.0441176470588235	0.0147058823529412
340	0.0294117647058824	0.0220588235294118	0.117647058823529	0.0514705882352941	0.0220588235294118	0.0220588235294118	0.0367647058823529	0.0220588235294118	0.0367647058823529	0.0147058823529412	0.00735294117647059	0.0441176470588235	0.0514705882352941	0.0147058823529412
350	0.0220588235294118	0.0294117647058824	0.125	0.0661764705882353	0.0367647058823529	0.0147058823529412	0.0220588235294118	0.0220588235294118	0.0367647058823529	0.0147058823529412	0.00735294117647059	0.0441176470588235	0.0514705882352941	0.0147058823529412
360	0.0294117647058824	0.0294117647058824	0.125	0.0735294117647059	0.0367647058823529	0.0220588235294118	0.0294117647058824	0.0220588235294118	0.0294117647058824	0.0147058823529412	0	0.0514705882352941	0.0588235294117647	0.0147058823529412
370	0.00735294117647059	0.0294117647058824	0.125	0.0735294117647059	0.0294117647058824	0.0367647058823529	0.0367647058823529	0.0294117647058824	0.0294117647058824	0.0147058823529412	0	0.0367647058823529	0.0514705882352941	0.0367647058823529
380	0.0220588235294118	0.0220588235294118	0.139705882352941	0.0735294117647059	0.0147058823529412	0.0367647058823529	0.0367647058823529	0.0294117647058824	0.0294117647058824	0.0220588235294118	0	0.0294117647058824	0.0514705882352941	0.0514705882352941
390	0.0367647058823529	0.0220588235294118	0.147058823529412	0.0588235294117647	0.0294117647058824	0.0294117647058824	0.0367647058823529	0.00735294117647059	0.0294117647058824	0.0220588235294118	0.00735294117647059	0.0220588235294118	0.0514705882352941	0.0220588235294118
400	0.0367647058823529	0.0294117647058824	0.147058823529412	0.0588235294117647	0.0441176470588235	0.0294117647058824	0.0367647058823529	0.00735294117647059	0.0294117647058824	0.0220588235294118	0	0.0294117647058824	0.0588235294117647	0.0294117647058824
410	0.0220588235294118	0.0220588235294118	0.169117647058824	0.0441176470588235	0.0220588235294118	0.0514705882352941	0.0294117647058824	0.0147058823529412	0.0367647058823529	0.0220588235294118	0.00735294117647059	0.0147058823529412	0.0367647058823529	0.0514705882352941
420	0.0147058823529412	0.0294117647058824	0.154411764705882	0.0514705882352941	0.0294117647058824	0.0147058823529412	0.0367647058823529	0.0367647058823529	0.0294117647058824	0.00735294117647059	0	0.0294117647058824	0.0514705882352941	0.0220588235294118
430	0.0220588235294118	0.0220588235294118	0.169117647058824	0.0588235294117647	0.0147058823529412	0.0294117647058824	0.0220588235294118	0.0367647058823529	0.0294117647058824	0.0294117647058824	0.0147058823529412	0.0294117647058824	0.0367647058823529	0.0367647058823529
440	0.0147058823529412	0.0220588235294118	0.154411764705882	0.0588235294117647	0.0294117647058824	0.0367647058823529	0.0367647058823529	0.0441176470588235	0.0294117647058824	0.0367647058823529	0.0147058823529412	0.0367647058823529	0.0294117647058824	0.0294117647058824
450	NaN	NaN	NaN	NaN	NaN	NaN	NaN	NaN	NaN	NaN	NaN	NaN	NaN	NaN
