# Supplementary material for: Frontal eye field and caudate neurons make different contributions to reward-biased perceptual decisions
Source: eLife. 2020 Nov 27;9:e60535. doi: 10.7554/eLife.60535 (PMC7695458; doi:10.7554/eLife.60535)
Supplement: Figure 3—source data 4. [file elife-60535-fig3-data4.csv]

time	Choice_pos	Choice_neg	Rewcont_pos	Rewcont_neg	Rewsize_pos	Rewsize_neg	RTnorm1_pos	RTnorm1_neg	RTnorm2_pos	RTnorm2_neg	RTnormRewSize1_pos	RTnormRewSize1_neg	RTnormRewsize2_pos	RTnormRewsize2_neg
-300	0.0634920634920635	0.0158730158730159	0.126984126984127	0.0317460317460317	0.0396825396825397	0.00793650793650794	0.0238095238095238	0.0634920634920635	0.0396825396825397	0.0396825396825397	0.0317460317460317	0.0158730158730159	0.00793650793650794	0.0158730158730159
-290	0.0634920634920635	0.0158730158730159	0.111111111111111	0.0396825396825397	0.0238095238095238	0.00793650793650794	0.0238095238095238	0.0476190476190476	0.0396825396825397	0.0396825396825397	0.0238095238095238	0.00793650793650794	0.00793650793650794	0.0158730158730159
-280	0.0396825396825397	0.00793650793650794	0.111111111111111	0.0238095238095238	0.0396825396825397	0.0158730158730159	0.0238095238095238	0.0317460317460317	0.0476190476190476	0.0476190476190476	0.0158730158730159	0.0158730158730159	0.0317460317460317	0.0158730158730159
-270	0.0317460317460317	0.00793650793650794	0.0873015873015873	0.0317460317460317	0.0317460317460317	0.0317460317460317	0.0238095238095238	0.0317460317460317	0.0396825396825397	0.0476190476190476	0.0158730158730159	0.00793650793650794	0.0317460317460317	0.0158730158730159
-260	0.0317460317460317	0.00793650793650794	0.103174603174603	0.0317460317460317	0	0.0238095238095238	0.0158730158730159	0.0396825396825397	0.0476190476190476	0.0317460317460317	0.0238095238095238	0.00793650793650794	0.0396825396825397	0.0158730158730159
-250	0.0317460317460317	0	0.111111111111111	0.0158730158730159	0.00793650793650794	0.0317460317460317	0.0238095238095238	0.0317460317460317	0.0555555555555556	0.0634920634920635	0.0238095238095238	0.0158730158730159	0.0555555555555556	0.00793650793650794
-240	0.0317460317460317	0.00793650793650794	0.0873015873015873	0.0238095238095238	0.0238095238095238	0.0317460317460317	0.0158730158730159	0.0238095238095238	0.0555555555555556	0.0396825396825397	0.0238095238095238	0.0317460317460317	0.0476190476190476	0.00793650793650794
-230	0.0317460317460317	0	0.119047619047619	0.0238095238095238	0.0158730158730159	0.0238095238095238	0.0396825396825397	0.0238095238095238	0.0476190476190476	0.0396825396825397	0.0158730158730159	0.0158730158730159	0.0476190476190476	0.00793650793650794
-220	0.0476190476190476	0.00793650793650794	0.111111111111111	0.0238095238095238	0.0158730158730159	0.0476190476190476	0.0317460317460317	0.0317460317460317	0.0555555555555556	0.0238095238095238	0.0238095238095238	0.0317460317460317	0.0476190476190476	0.00793650793650794
-210	0.0476190476190476	0	0.126984126984127	0.0238095238095238	0.00793650793650794	0.0317460317460317	0.0158730158730159	0.0317460317460317	0.0634920634920635	0.0317460317460317	0.0238095238095238	0.0238095238095238	0.0555555555555556	0.0158730158730159
-200	0.0396825396825397	0	0.111111111111111	0.0158730158730159	0.0158730158730159	0.00793650793650794	0.0476190476190476	0.0396825396825397	0.0396825396825397	0.0238095238095238	0.0238095238095238	0.0238095238095238	0.0317460317460317	0.00793650793650794
-190	0.0476190476190476	0	0.134920634920635	0.0238095238095238	0.0158730158730159	0.00793650793650794	0.0555555555555556	0.0396825396825397	0.0317460317460317	0.0476190476190476	0.0396825396825397	0.0396825396825397	0.0238095238095238	0.0158730158730159
-180	0.0634920634920635	0.0158730158730159	0.126984126984127	0.0238095238095238	0.0238095238095238	0.00793650793650794	0.0476190476190476	0.0317460317460317	0.0476190476190476	0.0476190476190476	0.0317460317460317	0.0476190476190476	0.0317460317460317	0.0317460317460317
-170	0.0476190476190476	0.0158730158730159	0.134920634920635	0.0238095238095238	0.0238095238095238	0.0158730158730159	0.0555555555555556	0.0317460317460317	0.0396825396825397	0.0317460317460317	0.0317460317460317	0.0317460317460317	0.0158730158730159	0.0396825396825397
-160	0.0476190476190476	0.0158730158730159	0.142857142857143	0.0238095238095238	0.0238095238095238	0.0317460317460317	0.0317460317460317	0.0317460317460317	0.0396825396825397	0.0396825396825397	0.0238095238095238	0.0238095238095238	0.0317460317460317	0.0317460317460317
-150	0.0476190476190476	0.00793650793650794	0.142857142857143	0.0158730158730159	0.0158730158730159	0.0158730158730159	0.0317460317460317	0.0317460317460317	0.0476190476190476	0.0476190476190476	0.0238095238095238	0.0238095238095238	0.0317460317460317	0.0317460317460317
-140	0.0476190476190476	0.0158730158730159	0.126984126984127	0.0238095238095238	0.00793650793650794	0.0158730158730159	0.0317460317460317	0.0396825396825397	0.0396825396825397	0.0238095238095238	0.0238095238095238	0.0158730158730159	0.0238095238095238	0.0396825396825397
-130	0.0634920634920635	0.00793650793650794	0.119047619047619	0.0238095238095238	0.0158730158730159	0.0317460317460317	0.0317460317460317	0.0476190476190476	0.0317460317460317	0.0238095238095238	0.0238095238095238	0.0317460317460317	0.0238095238095238	0.0238095238095238
-120	0.0714285714285714	0.00793650793650794	0.126984126984127	0.0238095238095238	0.0238095238095238	0.0158730158730159	0.0317460317460317	0.0555555555555556	0.0317460317460317	0.0396825396825397	0.00793650793650794	0.0238095238095238	0.0317460317460317	0.0238095238095238
-110	0.0634920634920635	0.00793650793650794	0.111111111111111	0.0158730158730159	0.0158730158730159	0.0158730158730159	0.0317460317460317	0.0476190476190476	0.0476190476190476	0.0238095238095238	0.0238095238095238	0.0317460317460317	0.0238095238095238	0.0317460317460317
-100	0.0555555555555556	0.00793650793650794	0.119047619047619	0.0238095238095238	0.00793650793650794	0.0158730158730159	0.0238095238095238	0.0476190476190476	0.0476190476190476	0.0317460317460317	0.0238095238095238	0.0317460317460317	0.0238095238095238	0.0317460317460317
-90	0.0476190476190476	0.0238095238095238	0.103174603174603	0.0158730158730159	0.0238095238095238	0.0158730158730159	0.0317460317460317	0.0476190476190476	0.0634920634920635	0.0317460317460317	0.0158730158730159	0.0396825396825397	0.0317460317460317	0.0317460317460317
-80	0.0396825396825397	0.0238095238095238	0.111111111111111	0.0158730158730159	0.0158730158730159	0.00793650793650794	0.0238095238095238	0.0555555555555556	0.0634920634920635	0.0317460317460317	0.0238095238095238	0.0158730158730159	0.00793650793650794	0.0476190476190476
-70	0.0396825396825397	0.0317460317460317	0.126984126984127	0.0238095238095238	0.0158730158730159	0.00793650793650794	0.0396825396825397	0.0396825396825397	0.0396825396825397	0.0317460317460317	0.0158730158730159	0.0396825396825397	0.00793650793650794	0.0317460317460317
-60	0.0634920634920635	0.0238095238095238	0.111111111111111	0.0238095238095238	0.00793650793650794	0.0158730158730159	0.0158730158730159	0.0555555555555556	0.0158730158730159	0.0396825396825397	0.0158730158730159	0.0317460317460317	0.00793650793650794	0.0238095238095238
-50	0.0238095238095238	0.0396825396825397	0.103174603174603	0.0238095238095238	0.00793650793650794	0.0158730158730159	0.0238095238095238	0.0634920634920635	0.0238095238095238	0.0238095238095238	0.0158730158730159	0.0396825396825397	0.0158730158730159	0.0158730158730159
-40	0.0317460317460317	0.0238095238095238	0.126984126984127	0.0238095238095238	0.0238095238095238	0.0317460317460317	0.0238095238095238	0.0634920634920635	0.0396825396825397	0.0317460317460317	0.0317460317460317	0.0396825396825397	0.0238095238095238	0.0317460317460317
-30	0.0317460317460317	0.0158730158730159	0.111111111111111	0.0238095238095238	0.0238095238095238	0.0317460317460317	0.0238095238095238	0.0873015873015873	0.0476190476190476	0.0317460317460317	0.0238095238095238	0.0396825396825397	0.0317460317460317	0.0238095238095238
-20	0.0158730158730159	0.00793650793650794	0.134920634920635	0.0238095238095238	0.0238095238095238	0.0158730158730159	0.0238095238095238	0.0634920634920635	0.0396825396825397	0.0317460317460317	0.0317460317460317	0.0238095238095238	0.0396825396825397	0.0238095238095238
-10	0.0238095238095238	0.00793650793650794	0.126984126984127	0.0238095238095238	0.0158730158730159	0.00793650793650794	0.0317460317460317	0.0555555555555556	0.0555555555555556	0.00793650793650794	0.0396825396825397	0.0238095238095238	0.0476190476190476	0.00793650793650794
0	0.0476190476190476	0.0158730158730159	0.126984126984127	0.0396825396825397	0.0317460317460317	0	0.0238095238095238	0.0555555555555556	0.0555555555555556	0.0158730158730159	0.0396825396825397	0.0317460317460317	0.0634920634920635	0.00793650793650794
10	0.0555555555555556	0.00793650793650794	0.111111111111111	0.0396825396825397	0.0238095238095238	0	0.0238095238095238	0.0476190476190476	0.0793650793650794	0.0317460317460317	0.0634920634920635	0.0317460317460317	0.0634920634920635	0.0158730158730159
20	0.0476190476190476	0.00793650793650794	0.158730158730159	0.0476190476190476	0.0238095238095238	0.00793650793650794	0.0158730158730159	0.0634920634920635	0.0634920634920635	0.0396825396825397	0.0555555555555556	0.0317460317460317	0.0317460317460317	0.00793650793650794
30	0.0555555555555556	0	0.111111111111111	0.0396825396825397	0.0238095238095238	0.0158730158730159	0.00793650793650794	0.0555555555555556	0.0714285714285714	0.0317460317460317	0.0555555555555556	0.0317460317460317	0.0396825396825397	0.00793650793650794
40	0.0396825396825397	0.0158730158730159	0.126984126984127	0.0317460317460317	0.0158730158730159	0.0158730158730159	0.00793650793650794	0.0634920634920635	0.0476190476190476	0.0317460317460317	0.0396825396825397	0.0158730158730159	0.0476190476190476	0.0396825396825397
50	0.0476190476190476	0.0158730158730159	0.150793650793651	0.0238095238095238	0.0238095238095238	0.0317460317460317	0.00793650793650794	0.0555555555555556	0.0555555555555556	0.0317460317460317	0.0476190476190476	0.0158730158730159	0.0476190476190476	0.0317460317460317
60	0.0396825396825397	0.0317460317460317	0.134920634920635	0.0158730158730159	0.0238095238095238	0.0158730158730159	0.00793650793650794	0.0634920634920635	0.0476190476190476	0.0158730158730159	0.0476190476190476	0.0158730158730159	0.0555555555555556	0.0238095238095238
70	0.0396825396825397	0.0158730158730159	0.126984126984127	0.0317460317460317	0.0396825396825397	0.0158730158730159	0.00793650793650794	0.0793650793650794	0.0555555555555556	0.0317460317460317	0.0396825396825397	0.0158730158730159	0.0555555555555556	0.0158730158730159
80	0.0317460317460317	0.0158730158730159	0.142857142857143	0.0317460317460317	0.0396825396825397	0.0238095238095238	0.00793650793650794	0.0952380952380952	0.0634920634920635	0.0317460317460317	0.0317460317460317	0.00793650793650794	0.0555555555555556	0.00793650793650794
90	0.0555555555555556	0.0158730158730159	0.134920634920635	0.0317460317460317	0.0555555555555556	0.0158730158730159	0.0158730158730159	0.0793650793650794	0.0873015873015873	0.0317460317460317	0.0317460317460317	0.0238095238095238	0.0555555555555556	0.0238095238095238
100	0.0634920634920635	0.0158730158730159	0.103174603174603	0.0238095238095238	0.0317460317460317	0.00793650793650794	0.0238095238095238	0.103174603174603	0.0555555555555556	0.0158730158730159	0.0317460317460317	0.0158730158730159	0.0396825396825397	0.0158730158730159
110	0.0476190476190476	0.0238095238095238	0.126984126984127	0.0396825396825397	0.0317460317460317	0	0.0158730158730159	0.103174603174603	0.0476190476190476	0.0158730158730159	0.0238095238095238	0	0.0396825396825397	0.0158730158730159
120	0.0793650793650794	0.00793650793650794	0.0952380952380952	0.0476190476190476	0.00793650793650794	0	0.00793650793650794	0.0793650793650794	0.0476190476190476	0.0238095238095238	0.00793650793650794	0	0.0396825396825397	0.0238095238095238
130	0.0793650793650794	0.00793650793650794	0.111111111111111	0.0634920634920635	0.0238095238095238	0	0.00793650793650794	0.0634920634920635	0.0555555555555556	0.00793650793650794	0.0238095238095238	0.0158730158730159	0.0555555555555556	0.0238095238095238
140	0.0714285714285714	0.00793650793650794	0.119047619047619	0.0793650793650794	0.0238095238095238	0.00793650793650794	0.0158730158730159	0.0793650793650794	0.0793650793650794	0.00793650793650794	0.0396825396825397	0.0158730158730159	0.0634920634920635	0.0238095238095238
150	0.0873015873015873	0.00793650793650794	0.126984126984127	0.0714285714285714	0.0396825396825397	0.0238095238095238	0.00793650793650794	0.0714285714285714	0.0634920634920635	0.00793650793650794	0.0396825396825397	0.0158730158730159	0.0396825396825397	0.0158730158730159
160	0.103174603174603	0.0238095238095238	0.126984126984127	0.0873015873015873	0.0238095238095238	0.0158730158730159	0.0158730158730159	0.0793650793650794	0.0793650793650794	0.00793650793650794	0.0396825396825397	0.00793650793650794	0.0317460317460317	0.0158730158730159
170	0.0873015873015873	0.0158730158730159	0.134920634920635	0.0793650793650794	0.0476190476190476	0.0396825396825397	0.00793650793650794	0.0793650793650794	0.0555555555555556	0.0158730158730159	0.0476190476190476	0.0158730158730159	0.0317460317460317	0.00793650793650794
180	0.126984126984127	0.0158730158730159	0.119047619047619	0.0555555555555556	0.0158730158730159	0.0158730158730159	0.0238095238095238	0.0714285714285714	0.0396825396825397	0.0396825396825397	0.0238095238095238	0.0317460317460317	0.0396825396825397	0.00793650793650794
190	0.119047619047619	0.0158730158730159	0.142857142857143	0.0555555555555556	0.00793650793650794	0.0158730158730159	0.0238095238095238	0.0873015873015873	0.0317460317460317	0.0396825396825397	0.0238095238095238	0.0158730158730159	0.0238095238095238	0.00793650793650794
200	0.126984126984127	0.0158730158730159	0.119047619047619	0.0476190476190476	0	0.0396825396825397	0.0158730158730159	0.103174603174603	0.0158730158730159	0.0396825396825397	0.0238095238095238	0.0158730158730159	0.0317460317460317	0.00793650793650794
210	0.126984126984127	0.0238095238095238	0.126984126984127	0.0555555555555556	0	0.0396825396825397	0.0158730158730159	0.103174603174603	0.0238095238095238	0.0238095238095238	0.0158730158730159	0.00793650793650794	0.00793650793650794	0
220	0.126984126984127	0.0317460317460317	0.119047619047619	0.0555555555555556	0.00793650793650794	0.0317460317460317	0.0158730158730159	0.0873015873015873	0.0238095238095238	0.0158730158730159	0.0158730158730159	0.0158730158730159	0.00793650793650794	0
230	0.158730158730159	0.0396825396825397	0.111111111111111	0.0476190476190476	0	0.0238095238095238	0.0238095238095238	0.0952380952380952	0.0158730158730159	0.00793650793650794	0.0238095238095238	0.0317460317460317	0.0158730158730159	0
240	0.166666666666667	0.0317460317460317	0.0952380952380952	0.0714285714285714	0	0.0317460317460317	0.0238095238095238	0.0952380952380952	0.0238095238095238	0.0317460317460317	0.0555555555555556	0.0317460317460317	0.00793650793650794	0
250	0.174603174603175	0.0238095238095238	0.0952380952380952	0.0873015873015873	0.0158730158730159	0.0396825396825397	0.0317460317460317	0.134920634920635	0.0238095238095238	0.0158730158730159	0.0238095238095238	0.0238095238095238	0.00793650793650794	0.00793650793650794
260	0.198412698412698	0.0317460317460317	0.0793650793650794	0.0714285714285714	0.0158730158730159	0.0317460317460317	0.0158730158730159	0.0873015873015873	0.0396825396825397	0.0158730158730159	0.0396825396825397	0.0238095238095238	0.0158730158730159	0
270	0.222222222222222	0.0396825396825397	0.0793650793650794	0.0714285714285714	0	0.0396825396825397	0.00793650793650794	0.119047619047619	0.0396825396825397	0.0158730158730159	0.00793650793650794	0.0396825396825397	0.0238095238095238	0.00793650793650794
280	0.198412698412698	0.0476190476190476	0.0793650793650794	0.0476190476190476	0	0.0555555555555556	0.00793650793650794	0.111111111111111	0.0634920634920635	0.0317460317460317	0.0317460317460317	0.0238095238095238	0.0238095238095238	0
290	0.19047619047619	0.0555555555555556	0.0714285714285714	0.0714285714285714	0.0158730158730159	0.0396825396825397	0.0317460317460317	0.0952380952380952	0.0555555555555556	0.0238095238095238	0.0476190476190476	0.0158730158730159	0.0238095238095238	0.00793650793650794
300	0.174603174603175	0.0476190476190476	0.0714285714285714	0.0634920634920635	0.0317460317460317	0.0238095238095238	0.0396825396825397	0.119047619047619	0.0238095238095238	0.0238095238095238	0.0238095238095238	0.0476190476190476	0	0.00793650793650794
310	0.166666666666667	0.0317460317460317	0.0555555555555556	0.0793650793650794	0.0238095238095238	0.0158730158730159	0.0476190476190476	0.119047619047619	0.0476190476190476	0.0317460317460317	0.0238095238095238	0.0396825396825397	0.0158730158730159	0.0158730158730159
320	0.206349206349206	0.0396825396825397	0.0555555555555556	0.0634920634920635	0.0158730158730159	0.0396825396825397	0.0238095238095238	0.0793650793650794	0.0396825396825397	0.0396825396825397	0.0238095238095238	0.0238095238095238	0.00793650793650794	0.0158730158730159
330	0.19047619047619	0.0476190476190476	0.0396825396825397	0.0793650793650794	0.0317460317460317	0.0396825396825397	0.0317460317460317	0.0952380952380952	0.0158730158730159	0.0158730158730159	0.0238095238095238	0.0238095238095238	0.00793650793650794	0.0158730158730159
340	0.214285714285714	0.0396825396825397	0.0634920634920635	0.0873015873015873	0.0238095238095238	0.0396825396825397	0.0317460317460317	0.0952380952380952	0.0317460317460317	0.00793650793650794	0.0238095238095238	0.0396825396825397	0	0.00793650793650794
350	0.174603174603175	0.0396825396825397	0.0634920634920635	0.0714285714285714	0.0317460317460317	0.0555555555555556	0.0317460317460317	0.0634920634920635	0.0317460317460317	0.0158730158730159	0.0238095238095238	0.0317460317460317	0.00793650793650794	0.00793650793650794
360	0.198412698412698	0.0396825396825397	0.0714285714285714	0.0634920634920635	0.0317460317460317	0.0634920634920635	0.0317460317460317	0.0873015873015873	0.0238095238095238	0.0158730158730159	0.0396825396825397	0.0317460317460317	0.0158730158730159	0.0158730158730159
370	0.182539682539683	0.0317460317460317	0.0714285714285714	0.0317460317460317	0.00793650793650794	0.0714285714285714	0.0317460317460317	0.0714285714285714	0.0317460317460317	0.0238095238095238	0.0476190476190476	0.0396825396825397	0.00793650793650794	0.0158730158730159
380	0.158730158730159	0.0158730158730159	0.0714285714285714	0.0555555555555556	0.00793650793650794	0.0555555555555556	0.0317460317460317	0.0793650793650794	0.0238095238095238	0.0476190476190476	0.0238095238095238	0.0396825396825397	0.0158730158730159	0.0238095238095238
390	0.182539682539683	0.0158730158730159	0.0476190476190476	0.0476190476190476	0.00793650793650794	0.0238095238095238	0.0317460317460317	0.0555555555555556	0.00793650793650794	0.0317460317460317	0.0317460317460317	0.0317460317460317	0	0.0158730158730159
400	0.182539682539683	0.0238095238095238	0.0714285714285714	0.0476190476190476	0.0158730158730159	0.0158730158730159	0.0238095238095238	0.0714285714285714	0.0158730158730159	0.0238095238095238	0.0158730158730159	0.0317460317460317	0	0.00793650793650794
410	0.158730158730159	0.0158730158730159	0.0634920634920635	0.0396825396825397	0.00793650793650794	0.0317460317460317	0.0317460317460317	0.0714285714285714	0.0158730158730159	0.0158730158730159	0.0158730158730159	0.0317460317460317	0	0.0158730158730159
420	0.150793650793651	0.00793650793650794	0.0634920634920635	0.0317460317460317	0.0158730158730159	0.0396825396825397	0.0317460317460317	0.0634920634920635	0.0238095238095238	0.0238095238095238	0.00793650793650794	0.0476190476190476	0.00793650793650794	0.0158730158730159
430	0.158730158730159	0.0158730158730159	0.0634920634920635	0.0476190476190476	0.0317460317460317	0.0317460317460317	0.0317460317460317	0.0634920634920635	0.0238095238095238	0.0238095238095238	0.00793650793650794	0.0396825396825397	0	0.0158730158730159
440	0.166666666666667	0	0.0714285714285714	0.0238095238095238	0.0238095238095238	0.0317460317460317	0.0238095238095238	0.0714285714285714	0.0158730158730159	0.0158730158730159	0.0238095238095238	0.0396825396825397	0.0158730158730159	0.0238095238095238
450	0.146341463414634	0.016260162601626	0.0650406504065041	0.032520325203252	0.024390243902439	0.00813008130081301	0.024390243902439	0.0813008130081301	0.016260162601626	0	0.016260162601626	0.016260162601626	0	0.00813008130081301
460	0.186991869918699	0.032520325203252	0.0487804878048781	0.040650406504065	0.00813008130081301	0.024390243902439	0.016260162601626	0.0731707317073171	0.016260162601626	0.00813008130081301	0.024390243902439	0.016260162601626	0.016260162601626	0.00813008130081301
470	0.155737704918033	0.040983606557377	0.0573770491803279	0.040983606557377	0.0245901639344262	0.040983606557377	0.00819672131147541	0.0819672131147541	0.0245901639344262	0	0.0163934426229508	0.0163934426229508	0.0163934426229508	0.00819672131147541
480	0.15702479338843	0.0330578512396694	0.0578512396694215	0.0495867768595041	0.00826446280991736	0.0247933884297521	0.0165289256198347	0.0661157024793388	0.0413223140495868	0.00826446280991736	0.0247933884297521	0.0165289256198347	0.0165289256198347	0
490	0.15702479338843	0.0247933884297521	0.0413223140495868	0.0495867768595041	0.0165289256198347	0.0165289256198347	0.0247933884297521	0.0495867768595041	0.0330578512396694	0.00826446280991736	0.0247933884297521	0.0165289256198347	0.0247933884297521	0.00826446280991736
500	0.12396694214876	0.0413223140495868	0.0495867768595041	0.0165289256198347	0.00826446280991736	0.0413223140495868	0.0330578512396694	0.0661157024793388	0.0495867768595041	0.0165289256198347	0.00826446280991736	0.00826446280991736	0.0247933884297521	0.0247933884297521
510	0.134453781512605	0.0168067226890756	0.0672268907563025	0.0252100840336134	0.00840336134453781	0.0504201680672269	0.0168067226890756	0.0420168067226891	0.0504201680672269	0	0.00840336134453781	0.00840336134453781	0.0252100840336134	0.0168067226890756
520	0.163793103448276	0.0258620689655172	0.0689655172413793	0.0603448275862069	0.0258620689655172	0.0431034482758621	0.0172413793103448	0.0603448275862069	0.0517241379310345	0.0172413793103448	0.00862068965517241	0	0.0258620689655172	0.0258620689655172
530	0.121739130434783	0.0260869565217391	0.0608695652173913	0.0347826086956522	0.0347826086956522	0.0434782608695652	0.0260869565217391	0.0695652173913043	0.0347826086956522	0.0260869565217391	0.00869565217391304	0.00869565217391304	0.0173913043478261	0.0347826086956522
540	0.131578947368421	0.0350877192982456	0.0614035087719298	0.0526315789473684	0.0350877192982456	0.043859649122807	0.0263157894736842	0.0614035087719298	0.0263157894736842	0.0263157894736842	0.0175438596491228	0.0087719298245614	0.0175438596491228	0.0263157894736842
550	0.123893805309735	0.0265486725663717	0.0353982300884956	0.0265486725663717	0.0353982300884956	0.0530973451327434	0.0176991150442478	0.0707964601769911	0.0176991150442478	0.00884955752212389	0.0265486725663717	0.00884955752212389	0.0176991150442478	0.0265486725663717
560	0.127272727272727	0.0363636363636364	0.0454545454545455	0.0454545454545455	0.0272727272727273	0.0363636363636364	0.0363636363636364	0.0454545454545455	0.0181818181818182	0.0181818181818182	0.0181818181818182	0.00909090909090909	0.0272727272727273	0.0363636363636364
570	0.109090909090909	0.0181818181818182	0.0545454545454545	0.0454545454545455	0.0272727272727273	0.0454545454545455	0.0272727272727273	0.0454545454545455	0.0181818181818182	0.00909090909090909	0.0181818181818182	0.0181818181818182	0.0181818181818182	0.0272727272727273
580	0.145454545454545	0.0181818181818182	0.0545454545454545	0.0363636363636364	0.0363636363636364	0.0272727272727273	0.0363636363636364	0.0545454545454545	0.00909090909090909	0.00909090909090909	0.00909090909090909	0.00909090909090909	0.0181818181818182	0.0272727272727273
590	0.127272727272727	0.00909090909090909	0.0545454545454545	0.0272727272727273	0.0272727272727273	0.0454545454545455	0.0181818181818182	0.0545454545454545	0.0272727272727273	0.00909090909090909	0.00909090909090909	0.00909090909090909	0.0272727272727273	0.0454545454545455
600	0.109090909090909	0.00909090909090909	0.0272727272727273	0.0363636363636364	0.0272727272727273	0.0363636363636364	0.0272727272727273	0.0636363636363636	0.0181818181818182	0.0272727272727273	0.00909090909090909	0.00909090909090909	0.0181818181818182	0.0363636363636364
610	0.101851851851852	0.00925925925925926	0.00925925925925926	0.0462962962962963	0.0185185185185185	0.0462962962962963	0.0277777777777778	0.0648148148148148	0.00925925925925926	0.00925925925925926	0	0	0.0185185185185185	0.0185185185185185
620	0.0961538461538462	0.0192307692307692	0.0192307692307692	0.0384615384615385	0.0288461538461538	0.0480769230769231	0.0288461538461538	0.0480769230769231	0.0288461538461538	0.00961538461538462	0.0192307692307692	0	0.00961538461538462	0.00961538461538462
630	0.0784313725490196	0.0294117647058824	0.0294117647058824	0.0196078431372549	0.0196078431372549	0.0392156862745098	0.0294117647058824	0.0490196078431373	0.00980392156862745	0.0294117647058824	0.0196078431372549	0.00980392156862745	0	0.0196078431372549
640	0.0918367346938776	0.0102040816326531	0.0408163265306122	0.0306122448979592	0.0204081632653061	0.0204081632653061	0.0306122448979592	0.0408163265306122	0.0102040816326531	0.0306122448979592	0.0204081632653061	0.0204081632653061	0.0102040816326531	0
650	0.0927835051546392	0.0309278350515464	0.0309278350515464	0.0412371134020619	0.0103092783505155	0.0309278350515464	0.0309278350515464	0.0515463917525773	0	0	0	0.0103092783505155	0.0103092783505155	0.0206185567010309
660	0.0947368421052632	0.0315789473684211	0.0315789473684211	0.0421052631578947	0.0210526315789474	0.0421052631578947	0.0315789473684211	0.0526315789473684	0.0210526315789474	0.0105263157894737	0	0.0210526315789474	0.0105263157894737	0.0421052631578947
670	0.0947368421052632	0.0315789473684211	0.0210526315789474	0.0421052631578947	0.0210526315789474	0.0210526315789474	0.0421052631578947	0.0315789473684211	0.0210526315789474	0.0315789473684211	0.0105263157894737	0.0210526315789474	0	0.0210526315789474
680	0.0978260869565217	0.0326086956521739	0.0108695652173913	0.0434782608695652	0.0217391304347826	0.0217391304347826	0.0434782608695652	0.0543478260869565	0.0217391304347826	0.0108695652173913	0	0.0217391304347826	0.0108695652173913	0.0326086956521739
690	0.111111111111111	0.0333333333333333	0.0111111111111111	0.0222222222222222	0	0.0555555555555556	0.0444444444444444	0.0222222222222222	0.0333333333333333	0	0	0.0222222222222222	0.032967032967033	0.010989010989011
700	0.105882352941176	0.0235294117647059	0	0.0235294117647059	0	0.0352941176470588	0.0352941176470588	0.0117647058823529	0.0235294117647059	0	0	0.0117647058823529	0	0.0116279069767442
710	0.105882352941176	0.0352941176470588	0	0	0	0.0235294117647059	0.0352941176470588	0.0352941176470588	0.0235294117647059	0	0	0.0352941176470588	0	0
720	0.0941176470588235	0.0470588235294118	0.0117647058823529	0.0117647058823529	0.0117647058823529	0.0235294117647059	0.0235294117647059	0.0235294117647059	0.0352941176470588	0.0117647058823529	0	0.0235294117647059	0.0235294117647059	0.0117647058823529
730	0.0963855421686747	0.0240963855421687	0.0120481927710843	0.0120481927710843	0	0.0240963855421687	0.0481927710843374	0.0120481927710843	0.0481927710843374	0	0	0.0240963855421687	0.0240963855421687	0
740	0.121951219512195	0.0487804878048781	0.024390243902439	0.0121951219512195	0	0.0487804878048781	0.0121951219512195	0.0121951219512195	0.0609756097560976	0.0121951219512195	0	0.0121951219512195	0.0365853658536585	0
750	0.126582278481013	0.0379746835443038	0.0253164556962025	0.0253164556962025	0.0126582278481013	0.0506329113924051	0.0253164556962025	0.0253164556962025	0.0759493670886076	0.0253164556962025	0	0.0253164556962025	0.0379746835443038	0.0126582278481013
760	0.113924050632911	0.0253164556962025	0.0253164556962025	0.0126582278481013	0	0.0253164556962025	0.0379746835443038	0.0126582278481013	0.0632911392405063	0.0126582278481013	0.0126582278481013	0.0253164556962025	0.0126582278481013	0
770	0.116883116883117	0.025974025974026	0.025974025974026	0.038961038961039	0.012987012987013	0.025974025974026	0.038961038961039	0.012987012987013	0.038961038961039	0.025974025974026	0	0.012987012987013	0.025974025974026	0
780	0.105263157894737	0.0263157894736842	0.0263157894736842	0.0526315789473684	0.0131578947368421	0.0394736842105263	0.0526315789473684	0.0131578947368421	0.0394736842105263	0.0263157894736842	0.0131578947368421	0.0131578947368421	0.0526315789473684	0.0131578947368421
790	0.1	0.0714285714285714	0.0142857142857143	0.0714285714285714	0.0714285714285714	0.0142857142857143	0.0428571428571429	0.0142857142857143	0.0285714285714286	0.0428571428571429	0	0.0428571428571429	0.0142857142857143	0.0428571428571429
800	0.117647058823529	0.0441176470588235	0.0294117647058824	0.0294117647058824	0.0294117647058824	0.0147058823529412	0.0441176470588235	0.0147058823529412	0.0294117647058824	0.0294117647058824	0	0.0147058823529412	0.0294117647058824	0.0294117647058824
