# Supplementary material for: Frontal eye field and caudate neurons make different contributions to reward-biased perceptual decisions
Source: eLife. 2020 Nov 27;9:e60535. doi: 10.7554/eLife.60535 (PMC7695458; doi:10.7554/eLife.60535)
Supplement: Figure 3—source data 5. [file elife-60535-fig3-data5.csv]

time	Choice_pos	Choice_neg	Rewcont_pos	Rewcont_neg	Rewsize_pos	Rewsize_neg	RTnorm1_pos	RTnorm1_neg	RTnorm2_pos	RTnorm2_neg	RTnormRewSize1_pos	RTnormRewSize1_neg	RTnormRewsize2_pos	RTnormRewsize2_neg
-300	0.0294117647058824	0.0367647058823529	0.132352941176471	0.0808823529411765	0.0147058823529412	0.0294117647058824	0	0.0147058823529412	0.0294117647058824	0	0.0294117647058824	0	0.0294117647058824	0.0367647058823529
-290	0.0294117647058824	0.0220588235294118	0.132352941176471	0.0882352941176471	0.0220588235294118	0.0220588235294118	0.00735294117647059	0	0.0220588235294118	0.00735294117647059	0.0367647058823529	0.00735294117647059	0.0367647058823529	0.0367647058823529
-280	0.0367647058823529	0.0367647058823529	0.125	0.0661764705882353	0.0441176470588235	0.0147058823529412	0.00735294117647059	0.00735294117647059	0.0220588235294118	0.00735294117647059	0.0367647058823529	0.00735294117647059	0.0441176470588235	0.0441176470588235
-270	0.0220588235294118	0.0441176470588235	0.102941176470588	0.0808823529411765	0.0220588235294118	0.0147058823529412	0.0220588235294118	0.0147058823529412	0.0220588235294118	0.0147058823529412	0.0147058823529412	0.0147058823529412	0.0441176470588235	0.0220588235294118
-260	0.0147058823529412	0.0367647058823529	0.0955882352941176	0.0661764705882353	0.0367647058823529	0.0220588235294118	0.0220588235294118	0.0147058823529412	0.0294117647058824	0.0294117647058824	0.0147058823529412	0.00735294117647059	0.0441176470588235	0.0220588235294118
-250	0.00735294117647059	0.0441176470588235	0.110294117647059	0.0588235294117647	0.0367647058823529	0.0147058823529412	0.0220588235294118	0.0147058823529412	0.0367647058823529	0.0294117647058824	0.00735294117647059	0.00735294117647059	0.0441176470588235	0.0147058823529412
-240	0.00735294117647059	0.0441176470588235	0.125	0.0661764705882353	0.0367647058823529	0.0220588235294118	0.0220588235294118	0.0294117647058824	0.0441176470588235	0.0220588235294118	0	0.0147058823529412	0.0441176470588235	0.0147058823529412
-230	0.00735294117647059	0.0441176470588235	0.139705882352941	0.0661764705882353	0.0294117647058824	0.0294117647058824	0.0147058823529412	0.0147058823529412	0.0441176470588235	0.0367647058823529	0	0.0147058823529412	0.0294117647058824	0.0147058823529412
-220	0.0147058823529412	0.0441176470588235	0.132352941176471	0.0882352941176471	0.0220588235294118	0.0294117647058824	0.0147058823529412	0.0294117647058824	0.0514705882352941	0.0294117647058824	0.00735294117647059	0.0147058823529412	0.0294117647058824	0.0147058823529412
-210	0.0220588235294118	0.0294117647058824	0.102941176470588	0.0955882352941176	0.0367647058823529	0.0294117647058824	0.00735294117647059	0.0367647058823529	0.0441176470588235	0.0514705882352941	0	0.0220588235294118	0.0220588235294118	0.0294117647058824
-200	0.0147058823529412	0.00735294117647059	0.110294117647059	0.0882352941176471	0.0294117647058824	0.0220588235294118	0.0147058823529412	0.0147058823529412	0.0367647058823529	0.0294117647058824	0	0.0147058823529412	0.0294117647058824	0.0367647058823529
-190	0.0367647058823529	0.0147058823529412	0.110294117647059	0.0808823529411765	0.0220588235294118	0.0294117647058824	0.0294117647058824	0.0367647058823529	0.0514705882352941	0.0294117647058824	0	0.0147058823529412	0.0441176470588235	0.0441176470588235
-180	0.0514705882352941	0.0220588235294118	0.110294117647059	0.0882352941176471	0.0220588235294118	0.0294117647058824	0.0294117647058824	0.0220588235294118	0.0441176470588235	0.0367647058823529	0.0147058823529412	0.00735294117647059	0.0367647058823529	0.0441176470588235
-170	0.0441176470588235	0.0147058823529412	0.102941176470588	0.0735294117647059	0.0147058823529412	0.0294117647058824	0.0367647058823529	0.0514705882352941	0.0441176470588235	0.0367647058823529	0.0220588235294118	0.0147058823529412	0.0220588235294118	0.0220588235294118
-160	0.0294117647058824	0.0147058823529412	0.110294117647059	0.0955882352941176	0.0147058823529412	0.0294117647058824	0.0367647058823529	0.0294117647058824	0.0294117647058824	0.0294117647058824	0.0294117647058824	0.00735294117647059	0.0220588235294118	0.00735294117647059
-150	0.0367647058823529	0	0.0955882352941176	0.0882352941176471	0.0220588235294118	0.0294117647058824	0.00735294117647059	0.0441176470588235	0.0367647058823529	0.0441176470588235	0.00735294117647059	0.00735294117647059	0.0220588235294118	0.00735294117647059
-140	0.0661764705882353	0.0147058823529412	0.110294117647059	0.110294117647059	0.0147058823529412	0.0514705882352941	0.0147058823529412	0.0367647058823529	0.0441176470588235	0.0367647058823529	0.00735294117647059	0.0147058823529412	0.0220588235294118	0.0220588235294118
-130	0.0441176470588235	0.0147058823529412	0.125	0.0955882352941176	0.00735294117647059	0.0441176470588235	0.0147058823529412	0.0514705882352941	0.0514705882352941	0.0294117647058824	0.0147058823529412	0	0.0294117647058824	0.0147058823529412
-120	0.0441176470588235	0.00735294117647059	0.125	0.0882352941176471	0.0220588235294118	0.0294117647058824	0.0147058823529412	0.0367647058823529	0.0367647058823529	0.0294117647058824	0.00735294117647059	0	0.0367647058823529	0
-110	0.0294117647058824	0.0147058823529412	0.147058823529412	0.110294117647059	0.0220588235294118	0.00735294117647059	0.0220588235294118	0.0367647058823529	0.0294117647058824	0.0367647058823529	0.0220588235294118	0.0147058823529412	0.0367647058823529	0.0147058823529412
-100	0.0367647058823529	0.00735294117647059	0.117647058823529	0.117647058823529	0.00735294117647059	0.0147058823529412	0.0220588235294118	0.0441176470588235	0.0441176470588235	0.0367647058823529	0.0147058823529412	0.0147058823529412	0.0294117647058824	0.0220588235294118
-90	0.0294117647058824	0.0147058823529412	0.117647058823529	0.125	0.00735294117647059	0.0147058823529412	0.0441176470588235	0.0441176470588235	0.0441176470588235	0.0367647058823529	0.0220588235294118	0	0.0294117647058824	0.0367647058823529
-80	0.0294117647058824	0.0147058823529412	0.117647058823529	0.117647058823529	0.00735294117647059	0.0147058823529412	0.0367647058823529	0.0294117647058824	0.0294117647058824	0.0441176470588235	0.0147058823529412	0	0.0514705882352941	0.0220588235294118
-70	0.0294117647058824	0.0147058823529412	0.102941176470588	0.110294117647059	0.0220588235294118	0.0220588235294118	0.0220588235294118	0.0294117647058824	0.0367647058823529	0.0294117647058824	0.00735294117647059	0.0294117647058824	0.0588235294117647	0.0294117647058824
-60	0.0294117647058824	0.0220588235294118	0.117647058823529	0.110294117647059	0.0220588235294118	0.0147058823529412	0.0294117647058824	0.0367647058823529	0.0367647058823529	0.0220588235294118	0	0.0294117647058824	0.0441176470588235	0.0294117647058824
-50	0.0294117647058824	0.0147058823529412	0.147058823529412	0.132352941176471	0.0220588235294118	0.0147058823529412	0.0220588235294118	0.0367647058823529	0.0441176470588235	0.0294117647058824	0	0.0294117647058824	0.0441176470588235	0.0147058823529412
-40	0.0294117647058824	0.0147058823529412	0.161764705882353	0.110294117647059	0.0220588235294118	0.0147058823529412	0.0294117647058824	0.0220588235294118	0.0367647058823529	0.0441176470588235	0.00735294117647059	0.0367647058823529	0.0294117647058824	0.0220588235294118
-30	0.0367647058823529	0.0147058823529412	0.139705882352941	0.125	0.0220588235294118	0.0294117647058824	0.0367647058823529	0.0147058823529412	0.0220588235294118	0.0514705882352941	0.00735294117647059	0.0514705882352941	0.0514705882352941	0.00735294117647059
-20	0.0367647058823529	0.0147058823529412	0.176470588235294	0.102941176470588	0.0220588235294118	0.0220588235294118	0.0441176470588235	0.0147058823529412	0.0367647058823529	0.0588235294117647	0.00735294117647059	0.0514705882352941	0.0514705882352941	0.0220588235294118
-10	0.0661764705882353	0.0147058823529412	0.154411764705882	0.132352941176471	0.0294117647058824	0.0294117647058824	0.0588235294117647	0.0220588235294118	0.0220588235294118	0.0367647058823529	0.00735294117647059	0.0514705882352941	0.0441176470588235	0.0294117647058824
0	0.0367647058823529	0.00735294117647059	0.169117647058824	0.110294117647059	0.0294117647058824	0.0367647058823529	0.0514705882352941	0.0220588235294118	0.0147058823529412	0.0367647058823529	0.0147058823529412	0.0367647058823529	0.0441176470588235	0.0294117647058824
10	0.0294117647058824	0.0147058823529412	0.161764705882353	0.0955882352941176	0.0220588235294118	0.0147058823529412	0.0514705882352941	0.0147058823529412	0.0220588235294118	0.0588235294117647	0.00735294117647059	0.0294117647058824	0.0514705882352941	0.0441176470588235
20	0.0220588235294118	0.00735294117647059	0.198529411764706	0.0808823529411765	0.0220588235294118	0.0220588235294118	0.0514705882352941	0.0220588235294118	0.0220588235294118	0.0441176470588235	0.0147058823529412	0.0294117647058824	0.0441176470588235	0.0441176470588235
30	0.0294117647058824	0.0147058823529412	0.176470588235294	0.0808823529411765	0.0220588235294118	0.0147058823529412	0.0441176470588235	0.0220588235294118	0.0294117647058824	0.0294117647058824	0.0294117647058824	0.0367647058823529	0.0441176470588235	0.0367647058823529
40	0.0294117647058824	0.0294117647058824	0.183823529411765	0.0808823529411765	0.0220588235294118	0.0220588235294118	0.0441176470588235	0.0220588235294118	0.0514705882352941	0.0294117647058824	0.0367647058823529	0.0294117647058824	0.0441176470588235	0.0367647058823529
50	0.0220588235294118	0.0294117647058824	0.183823529411765	0.0588235294117647	0.0147058823529412	0.0220588235294118	0.0367647058823529	0.0294117647058824	0.0514705882352941	0.0294117647058824	0.0367647058823529	0.0294117647058824	0.0367647058823529	0.0220588235294118
60	0.0147058823529412	0.0220588235294118	0.183823529411765	0.0661764705882353	0.0147058823529412	0.0367647058823529	0.0294117647058824	0.0294117647058824	0.0441176470588235	0.0514705882352941	0.0294117647058824	0.0294117647058824	0.0367647058823529	0.0294117647058824
70	0.0367647058823529	0.0147058823529412	0.183823529411765	0.0808823529411765	0.0294117647058824	0.0294117647058824	0.0294117647058824	0.0220588235294118	0.0294117647058824	0.0441176470588235	0.0294117647058824	0.0367647058823529	0.0294117647058824	0.0220588235294118
80	0.0367647058823529	0.0367647058823529	0.191176470588235	0.0661764705882353	0.0294117647058824	0.00735294117647059	0.0294117647058824	0.0220588235294118	0.0441176470588235	0.0514705882352941	0.0441176470588235	0.0294117647058824	0.0220588235294118	0.0367647058823529
90	0.0220588235294118	0.0294117647058824	0.213235294117647	0.0735294117647059	0.0147058823529412	0.0147058823529412	0.0367647058823529	0.0220588235294118	0.0294117647058824	0.0441176470588235	0.0441176470588235	0.0220588235294118	0.0220588235294118	0.0367647058823529
100	0.0441176470588235	0.0294117647058824	0.25	0.0808823529411765	0.00735294117647059	0.0220588235294118	0.0441176470588235	0.0220588235294118	0.0367647058823529	0.0441176470588235	0.0367647058823529	0.0220588235294118	0.0294117647058824	0.0514705882352941
110	0.0367647058823529	0.0220588235294118	0.235294117647059	0.0808823529411765	0.0147058823529412	0.0367647058823529	0.0220588235294118	0.0514705882352941	0.0147058823529412	0.0588235294117647	0.0367647058823529	0.0220588235294118	0.0220588235294118	0.0588235294117647
120	0.0441176470588235	0.0294117647058824	0.242647058823529	0.0955882352941176	0.00735294117647059	0.0294117647058824	0.0294117647058824	0.0735294117647059	0.0294117647058824	0.0588235294117647	0.0367647058823529	0.0220588235294118	0.0147058823529412	0.0367647058823529
130	0.0808823529411765	0.0441176470588235	0.242647058823529	0.110294117647059	0.0220588235294118	0.0367647058823529	0.0441176470588235	0.0735294117647059	0.0441176470588235	0.0661764705882353	0.0294117647058824	0.0220588235294118	0.0147058823529412	0.0441176470588235
140	0.0808823529411765	0.0367647058823529	0.235294117647059	0.125	0.0294117647058824	0.0441176470588235	0.0220588235294118	0.0661764705882353	0.0220588235294118	0.0661764705882353	0.0367647058823529	0.0514705882352941	0.0147058823529412	0.0294117647058824
150	0.102941176470588	0.0588235294117647	0.227941176470588	0.147058823529412	0.0220588235294118	0.0514705882352941	0.0441176470588235	0.0808823529411765	0.0367647058823529	0.0514705882352941	0.0367647058823529	0.0367647058823529	0.0220588235294118	0.0367647058823529
160	0.110294117647059	0.102941176470588	0.235294117647059	0.139705882352941	0.0514705882352941	0.0514705882352941	0.0220588235294118	0.0882352941176471	0.0294117647058824	0.0514705882352941	0.0294117647058824	0.0514705882352941	0.0220588235294118	0.0441176470588235
170	0.102941176470588	0.102941176470588	0.227941176470588	0.132352941176471	0.0588235294117647	0.0441176470588235	0.0294117647058824	0.0808823529411765	0.0294117647058824	0.0514705882352941	0.0514705882352941	0.0808823529411765	0.0294117647058824	0.0367647058823529
180	0.110294117647059	0.102941176470588	0.235294117647059	0.117647058823529	0.0808823529411765	0.0441176470588235	0.0147058823529412	0.0882352941176471	0.0441176470588235	0.0661764705882353	0.0367647058823529	0.0882352941176471	0.0294117647058824	0.0441176470588235
190	0.125	0.110294117647059	0.227941176470588	0.132352941176471	0.0735294117647059	0.0441176470588235	0.0367647058823529	0.102941176470588	0.0441176470588235	0.0588235294117647	0.0441176470588235	0.0661764705882353	0.0220588235294118	0.0514705882352941
200	0.161764705882353	0.132352941176471	0.220588235294118	0.132352941176471	0.0735294117647059	0.0441176470588235	0.0514705882352941	0.0882352941176471	0.0220588235294118	0.0661764705882353	0.0514705882352941	0.0514705882352941	0.0294117647058824	0.0220588235294118
210	0.147058823529412	0.139705882352941	0.227941176470588	0.169117647058824	0.0808823529411765	0.0441176470588235	0.0441176470588235	0.102941176470588	0.0220588235294118	0.0735294117647059	0.0588235294117647	0.0441176470588235	0.0294117647058824	0.0367647058823529
220	0.139705882352941	0.139705882352941	0.235294117647059	0.161764705882353	0.0808823529411765	0.0588235294117647	0.0220588235294118	0.102941176470588	0.0367647058823529	0.0808823529411765	0.0441176470588235	0.0441176470588235	0.0220588235294118	0.0294117647058824
230	0.147058823529412	0.147058823529412	0.227941176470588	0.161764705882353	0.0955882352941176	0.0808823529411765	0.0294117647058824	0.0955882352941176	0.0367647058823529	0.0808823529411765	0.0367647058823529	0.0367647058823529	0.0294117647058824	0.0220588235294118
240	0.169117647058824	0.147058823529412	0.205882352941176	0.176470588235294	0.0808823529411765	0.0588235294117647	0.0294117647058824	0.0808823529411765	0.0441176470588235	0.0882352941176471	0.0441176470588235	0.0367647058823529	0.0514705882352941	0.0294117647058824
250	0.183823529411765	0.161764705882353	0.198529411764706	0.205882352941176	0.0661764705882353	0.0588235294117647	0.0441176470588235	0.0882352941176471	0.0294117647058824	0.102941176470588	0.0514705882352941	0.0441176470588235	0.0294117647058824	0.0588235294117647
260	0.169117647058824	0.161764705882353	0.176470588235294	0.198529411764706	0.0588235294117647	0.0661764705882353	0.0367647058823529	0.0808823529411765	0.0294117647058824	0.0882352941176471	0.0588235294117647	0.0367647058823529	0.0220588235294118	0.0441176470588235
270	0.176470588235294	0.154411764705882	0.183823529411765	0.198529411764706	0.0514705882352941	0.0808823529411765	0.0294117647058824	0.0735294117647059	0.0220588235294118	0.110294117647059	0.0441176470588235	0.0147058823529412	0.0147058823529412	0.0514705882352941
280	0.154411764705882	0.139705882352941	0.176470588235294	0.198529411764706	0.0661764705882353	0.0955882352941176	0.0294117647058824	0.0808823529411765	0.0367647058823529	0.0882352941176471	0.0514705882352941	0.0367647058823529	0.0147058823529412	0.0441176470588235
290	0.161764705882353	0.125	0.154411764705882	0.183823529411765	0.0808823529411765	0.0735294117647059	0.0220588235294118	0.0735294117647059	0.0514705882352941	0.0735294117647059	0.0661764705882353	0.0294117647058824	0.00735294117647059	0.0367647058823529
300	0.169117647058824	0.117647058823529	0.147058823529412	0.176470588235294	0.0661764705882353	0.110294117647059	0.0147058823529412	0.0808823529411765	0.0514705882352941	0.0808823529411765	0.0367647058823529	0.00735294117647059	0.00735294117647059	0.0441176470588235
310	0.161764705882353	0.125	0.154411764705882	0.176470588235294	0.0514705882352941	0.117647058823529	0.0220588235294118	0.0882352941176471	0.0367647058823529	0.0735294117647059	0.0367647058823529	0.0147058823529412	0.0147058823529412	0.0294117647058824
320	0.154411764705882	0.154411764705882	0.132352941176471	0.176470588235294	0.0588235294117647	0.0661764705882353	0.0220588235294118	0.0735294117647059	0.0367647058823529	0.0955882352941176	0.0367647058823529	0.0220588235294118	0.0147058823529412	0.0514705882352941
330	0.139705882352941	0.147058823529412	0.102941176470588	0.161764705882353	0.0588235294117647	0.0882352941176471	0.0220588235294118	0.0882352941176471	0.0441176470588235	0.0735294117647059	0.0514705882352941	0.0147058823529412	0.0220588235294118	0.0367647058823529
340	0.154411764705882	0.147058823529412	0.102941176470588	0.132352941176471	0.0514705882352941	0.0955882352941176	0.0220588235294118	0.0735294117647059	0.0294117647058824	0.0808823529411765	0.0441176470588235	0.0220588235294118	0.0294117647058824	0.0441176470588235
350	0.139705882352941	0.147058823529412	0.102941176470588	0.139705882352941	0.0441176470588235	0.102941176470588	0.0441176470588235	0.0808823529411765	0.0294117647058824	0.0882352941176471	0.0441176470588235	0.0220588235294118	0.0367647058823529	0.0514705882352941
360	0.154411764705882	0.117647058823529	0.132352941176471	0.139705882352941	0.0441176470588235	0.0661764705882353	0.0367647058823529	0.0808823529411765	0.0367647058823529	0.0882352941176471	0.0441176470588235	0.0367647058823529	0.0441176470588235	0.0588235294117647
370	0.139705882352941	0.117647058823529	0.117647058823529	0.139705882352941	0.0367647058823529	0.0441176470588235	0.0367647058823529	0.0735294117647059	0.0441176470588235	0.0808823529411765	0.0441176470588235	0.0147058823529412	0.0367647058823529	0.0588235294117647
380	0.132352941176471	0.117647058823529	0.102941176470588	0.125	0.0441176470588235	0.0588235294117647	0.0661764705882353	0.0441176470588235	0.0441176470588235	0.0882352941176471	0.0367647058823529	0.0220588235294118	0.0441176470588235	0.0514705882352941
390	0.147058823529412	0.125	0.102941176470588	0.110294117647059	0.0514705882352941	0.0588235294117647	0.0441176470588235	0.0955882352941176	0.0367647058823529	0.0882352941176471	0.0441176470588235	0.0441176470588235	0.0220588235294118	0.0588235294117647
400	0.117647058823529	0.132352941176471	0.0808823529411765	0.110294117647059	0.0588235294117647	0.0441176470588235	0.0294117647058824	0.0661764705882353	0.0441176470588235	0.0808823529411765	0.0441176470588235	0.0441176470588235	0.0220588235294118	0.0661764705882353
410	0.125	0.132352941176471	0.102941176470588	0.0808823529411765	0.0514705882352941	0.0441176470588235	0.0367647058823529	0.0661764705882353	0.0514705882352941	0.0808823529411765	0.0294117647058824	0.0294117647058824	0.0220588235294118	0.0808823529411765
420	0.110294117647059	0.125	0.0735294117647059	0.0808823529411765	0.0367647058823529	0.0367647058823529	0.0367647058823529	0.0588235294117647	0.0588235294117647	0.0735294117647059	0.0514705882352941	0.0367647058823529	0.0220588235294118	0.0441176470588235
430	0.132352941176471	0.117647058823529	0.0588235294117647	0.0955882352941176	0.0441176470588235	0.0294117647058824	0.0514705882352941	0.0514705882352941	0.0661764705882353	0.0735294117647059	0.0441176470588235	0.0367647058823529	0.0294117647058824	0.0588235294117647
440	0.132352941176471	0.110294117647059	0.0367647058823529	0.102941176470588	0.0367647058823529	0.0294117647058824	0.0441176470588235	0.0588235294117647	0.0514705882352941	0.0735294117647059	0.0441176470588235	0.0367647058823529	0.0220588235294118	0.0514705882352941
450	0.132352941176471	0.102941176470588	0.0367647058823529	0.0514705882352941	0.0294117647058824	0.0367647058823529	0.0294117647058824	0.0735294117647059	0.0441176470588235	0.0588235294117647	0.0367647058823529	0.0220588235294118	0.0147058823529412	0.0514705882352941
460	0.117647058823529	0.0955882352941176	0.0367647058823529	0.0808823529411765	0.0441176470588235	0.0294117647058824	0.00735294117647059	0.0735294117647059	0.0588235294117647	0.0588235294117647	0.0367647058823529	0.0147058823529412	0.0147058823529412	0.0514705882352941
470	0.117647058823529	0.0955882352941176	0.0367647058823529	0.0661764705882353	0.0220588235294118	0.0220588235294118	0.0294117647058824	0.0661764705882353	0.0661764705882353	0.0514705882352941	0.0514705882352941	0.0220588235294118	0.0147058823529412	0.0514705882352941
480	0.117647058823529	0.0955882352941176	0.0514705882352941	0.0588235294117647	0.0294117647058824	0.0220588235294118	0.0294117647058824	0.0588235294117647	0.0514705882352941	0.0588235294117647	0.0367647058823529	0.0220588235294118	0.0220588235294118	0.0514705882352941
490	0.110294117647059	0.102941176470588	0.0514705882352941	0.0661764705882353	0.0294117647058824	0.0367647058823529	0.0294117647058824	0.0661764705882353	0.0661764705882353	0.0735294117647059	0.0294117647058824	0.0220588235294118	0.0220588235294118	0.0588235294117647
500	0.110294117647059	0.102941176470588	0.0735294117647059	0.0588235294117647	0.0147058823529412	0.0514705882352941	0.0367647058823529	0.0808823529411765	0.0661764705882353	0.0735294117647059	0.0367647058823529	0.0220588235294118	0.0294117647058824	0.0514705882352941
510	0.132352941176471	0.110294117647059	0.0808823529411765	0.0661764705882353	0.0294117647058824	0.0367647058823529	0.0220588235294118	0.0514705882352941	0.0661764705882353	0.0661764705882353	0.0294117647058824	0.0294117647058824	0.0441176470588235	0.0514705882352941
520	0.154411764705882	0.0808823529411765	0.0441176470588235	0.0661764705882353	0.0294117647058824	0.0294117647058824	0.0220588235294118	0.0735294117647059	0.0661764705882353	0.0514705882352941	0.0220588235294118	0.0294117647058824	0.0441176470588235	0.0588235294117647
530	0.139705882352941	0.0882352941176471	0.0514705882352941	0.0661764705882353	0.0220588235294118	0.0367647058823529	0.0220588235294118	0.0514705882352941	0.0588235294117647	0.0588235294117647	0.0367647058823529	0.0220588235294118	0.0441176470588235	0.0588235294117647
540	0.117647058823529	0.0808823529411765	0.0441176470588235	0.0441176470588235	0.0147058823529412	0.0220588235294118	0.0147058823529412	0.0514705882352941	0.0514705882352941	0.0514705882352941	0.0147058823529412	0.0367647058823529	0.0441176470588235	0.0441176470588235
550	0.110294117647059	0.0882352941176471	0.0294117647058824	0.0441176470588235	0.0294117647058824	0	0.0220588235294118	0.0588235294117647	0.0514705882352941	0.0441176470588235	0.0220588235294118	0.0220588235294118	0.0367647058823529	0.0441176470588235
560	0.110294117647059	0.0808823529411765	0.0367647058823529	0.0441176470588235	0.0220588235294118	0.00735294117647059	0.0294117647058824	0.0588235294117647	0.0514705882352941	0.0514705882352941	0.0147058823529412	0.0367647058823529	0.0367647058823529	0.0294117647058824
570	0.0882352941176471	0.0955882352941176	0.0514705882352941	0.0588235294117647	0.0367647058823529	0.00735294117647059	0.0441176470588235	0.0735294117647059	0.0441176470588235	0.0588235294117647	0.0220588235294118	0.0367647058823529	0.0294117647058824	0.0514705882352941
580	0.0808823529411765	0.0808823529411765	0.0294117647058824	0.0588235294117647	0.0294117647058824	0.0147058823529412	0.0441176470588235	0.0735294117647059	0.0367647058823529	0.0441176470588235	0.0147058823529412	0.0220588235294118	0.0367647058823529	0.0294117647058824
590	0.0955882352941176	0.0735294117647059	0.0294117647058824	0.0588235294117647	0.00735294117647059	0.0220588235294118	0.0367647058823529	0.0661764705882353	0.0441176470588235	0.0514705882352941	0.0220588235294118	0.0147058823529412	0.0441176470588235	0.0514705882352941
600	0.102941176470588	0.0808823529411765	0.0220588235294118	0.0588235294117647	0.0294117647058824	0.00735294117647059	0.0294117647058824	0.0735294117647059	0.0588235294117647	0.0588235294117647	0.0441176470588235	0.0147058823529412	0.0367647058823529	0.0441176470588235
610	0.103703703703704	0.0444444444444444	0.0296296296296296	0.0296296296296296	0.00740740740740741	0.0148148148148148	0.0444444444444444	0.0592592592592593	0.0518518518518519	0.0518518518518519	0.0296296296296296	0.0148148148148148	0.0222222222222222	0.0592592592592593
620	0.0970149253731343	0.0597014925373134	0.0373134328358209	0.0447761194029851	0.0149253731343284	0.0149253731343284	0.0373134328358209	0.0522388059701493	0.0522388059701493	0.0522388059701493	0.0223880597014925	0.0223880597014925	0.0447761194029851	0.0597014925373134
630	0.0977443609022556	0.0601503759398496	0.037593984962406	0.0451127819548872	0.0150375939849624	0.0150375939849624	0.037593984962406	0.037593984962406	0.037593984962406	0.0451127819548872	0.0150375939849624	0.0300751879699248	0.0451127819548872	0.0451127819548872
640	0.106060606060606	0.0681818181818182	0.0227272727272727	0.053030303030303	0.0151515151515152	0.0227272727272727	0.0378787878787879	0.0378787878787879	0.0454545454545455	0.0606060606060606	0.0151515151515152	0.0303030303030303	0.0227272727272727	0.0378787878787879
650	0.0984848484848485	0.0606060606060606	0.0378787878787879	0.0454545454545455	0.0151515151515152	0.0227272727272727	0.053030303030303	0.0606060606060606	0.0378787878787879	0.053030303030303	0.0151515151515152	0.0227272727272727	0.0303030303030303	0.0378787878787879
660	0.109375	0.0625	0.03125	0.046875	0.015625	0.0390625	0.046875	0.046875	0.03125	0.0546875	0.015625	0.03125	0.03125	0.0390625
670	0.1015625	0.0625	0.0390625	0.0390625	0.015625	0.03125	0.0390625	0.0546875	0.0234375	0.0625	0.0234375	0.046875	0.0234375	0.03125
680	0.094488188976378	0.062992125984252	0.0393700787401575	0.0393700787401575	0.0236220472440945	0.0236220472440945	0.0708661417322835	0.047244094488189	0.0236220472440945	0.047244094488189	0.0236220472440945	0.0393700787401575	0.031496062992126	0.015748031496063
690	0.094488188976378	0.0551181102362205	0.0393700787401575	0.0551181102362205	0.0236220472440945	0.0236220472440945	0.0708661417322835	0.0393700787401575	0.0236220472440945	0.031496062992126	0.031496062992126	0.0551181102362205	0.0236220472440945	0.0236220472440945
700	0.110236220472441	0.0551181102362205	0.047244094488189	0.047244094488189	0.031496062992126	0.0393700787401575	0.078740157480315	0.0393700787401575	0.047244094488189	0.0236220472440945	0.015748031496063	0.0551181102362205	0.0393700787401575	0.0236220472440945
710	0.110236220472441	0.078740157480315	0.031496062992126	0.0393700787401575	0.0236220472440945	0.0236220472440945	0.078740157480315	0.0393700787401575	0.047244094488189	0.0236220472440945	0.0236220472440945	0.0393700787401575	0.031496062992126	0.0236220472440945
720	0.0952380952380952	0.0555555555555556	0.0317460317460317	0.0317460317460317	0.0238095238095238	0.0238095238095238	0.0634920634920635	0.0396825396825397	0.0476190476190476	0.0238095238095238	0.0158730158730159	0.0396825396825397	0.0238095238095238	0.0238095238095238
730	0.0952380952380952	0.0634920634920635	0.0238095238095238	0.0396825396825397	0.0158730158730159	0.00793650793650794	0.0555555555555556	0.0396825396825397	0.0317460317460317	0.0317460317460317	0.0158730158730159	0.0158730158730159	0.0238095238095238	0.0317460317460317
740	0.0873015873015873	0.0317460317460317	0.00793650793650794	0.0238095238095238	0.00793650793650794	0.0158730158730159	0.0476190476190476	0.0555555555555556	0.0396825396825397	0.0317460317460317	0.0158730158730159	0.0238095238095238	0.0158730158730159	0.0317460317460317
750	0.0887096774193548	0.0403225806451613	0.00806451612903226	0.0161290322580645	0.0161290322580645	0.0161290322580645	0.0161290322580645	0.0564516129032258	0.0483870967741935	0.0241935483870968	0	0.00806451612903226	0.0241935483870968	0.032258064516129
760	0.0894308943089431	0.040650406504065	0.00813008130081301	0.024390243902439	0.016260162601626	0.016260162601626	0.032520325203252	0.0650406504065041	0.032520325203252	0.040650406504065	0.016260162601626	0.016260162601626	0.024390243902439	0.032520325203252
770	0.0991735537190083	0.0413223140495868	0	0.0165289256198347	0.0247933884297521	0.00826446280991736	0.0330578512396694	0.0661157024793388	0.0330578512396694	0.0495867768595041	0.00826446280991736	0.0165289256198347	0.0330578512396694	0.0330578512396694
780	0.107438016528926	0.0413223140495868	0	0.0413223140495868	0.0247933884297521	0.0165289256198347	0.0247933884297521	0.0578512396694215	0.0495867768595041	0.0330578512396694	0.0247933884297521	0.0247933884297521	0.0247933884297521	0.0413223140495868
790	0.0916666666666667	0.05	0	0.025	0.0166666666666667	0.00833333333333333	0.0166666666666667	0.075	0.05	0.025	0.0166666666666667	0.025	0.0166666666666667	0.025
800	0.0840336134453782	0.0336134453781513	0	0.0252100840336134	0.0252100840336134	0.00840336134453781	0.0168067226890756	0.0756302521008403	0.0420168067226891	0.0252100840336134	0.0168067226890756	0.0168067226890756	0.0252100840336134	0.0336134453781513
