# Supplementary material for: Frontal eye field and caudate neurons make different contributions to reward-biased perceptual decisions
Source: eLife. 2020 Nov 27;9:e60535. doi: 10.7554/eLife.60535 (PMC7695458; doi:10.7554/eLife.60535)
Supplement: Figure 3—source data 6. [file elife-60535-fig3-data6.csv]

time	Choice_pos	Choice_neg	Rewcont_pos	Rewcont_neg	Rewsize_pos	Rewsize_neg	RTnorm1_pos	RTnorm1_neg	RTnorm2_pos	RTnorm2_neg	RTnormRewSize1_pos	RTnormRewSize1_neg	RTnormRewsize2_pos	RTnormRewsize2_neg
-800	0	0.0375	0.0125	0.025	0.0375	0.0375	0.125	0.0125	0.05	0.05	0.05	0.025	0	0.025
-790	0.0120481927710843	0.0240963855421687	0.0120481927710843	0.0120481927710843	0.036144578313253	0.0240963855421687	0.120481927710843	0.0240963855421687	0.0602409638554217	0.0240963855421687	0.0481927710843374	0.0240963855421687	0	0.0240963855421687
-780	0.0240963855421687	0.036144578313253	0.0120481927710843	0.0120481927710843	0.036144578313253	0.036144578313253	0.120481927710843	0.036144578313253	0.0602409638554217	0.0602409638554217	0.036144578313253	0	0	0.036144578313253
-770	0.0235294117647059	0.0352941176470588	0.0235294117647059	0	0.0117647058823529	0.0235294117647059	0.129411764705882	0.0352941176470588	0.0705882352941176	0.0235294117647059	0.0470588235294118	0.0117647058823529	0.0117647058823529	0.0235294117647059
-760	0.0117647058823529	0.0235294117647059	0.0235294117647059	0	0.0117647058823529	0.0117647058823529	0.141176470588235	0.0235294117647059	0.0705882352941176	0.0470588235294118	0.0235294117647059	0.0117647058823529	0.0117647058823529	0.0352941176470588
-750	0.0114942528735632	0.0229885057471264	0.0344827586206897	0	0.0114942528735632	0.0114942528735632	0.149425287356322	0.0344827586206897	0.0689655172413793	0.0344827586206897	0.0229885057471264	0.0229885057471264	0.0113636363636364	0.0454545454545455
-740	0.010989010989011	0.021978021978022	0.010989010989011	0.010989010989011	0.021978021978022	0.021978021978022	0.120879120879121	0.021978021978022	0.0659340659340659	0.021978021978022	0.032967032967033	0.021978021978022	0	0.032967032967033
-730	0.0108695652173913	0.0108695652173913	0.0217391304347826	0.0108695652173913	0.0217391304347826	0.0108695652173913	0.119565217391304	0.0434782608695652	0.0543478260869565	0.0108695652173913	0.0217391304347826	0.0326086956521739	0	0.0326086956521739
-720	0.0210526315789474	0.0315789473684211	0.0315789473684211	0.0315789473684211	0.0421052631578947	0.0105263157894737	0.115789473684211	0.0421052631578947	0.0631578947368421	0.0421052631578947	0.0210526315789474	0.0315789473684211	0	0.0421052631578947
-710	0.0105263157894737	0.0105263157894737	0.0210526315789474	0.0105263157894737	0.0210526315789474	0.0105263157894737	0.105263157894737	0.0315789473684211	0.0631578947368421	0.0315789473684211	0.0210526315789474	0.0421052631578947	0	0.0210526315789474
-700	0.0206185567010309	0.0103092783505155	0.0206185567010309	0.0103092783505155	0.0206185567010309	0.0309278350515464	0.11340206185567	0.0412371134020619	0.0618556701030928	0.0206185567010309	0.0309278350515464	0.0412371134020619	0	0.0206185567010309
-690	0.0204081632653061	0.0102040816326531	0.0204081632653061	0.0102040816326531	0.0306122448979592	0.0306122448979592	0.112244897959184	0.0408163265306122	0.0510204081632653	0.0102040816326531	0.0306122448979592	0.0510204081632653	0.0102040816326531	0.0102040816326531
-680	0.0194174757281553	0.00970873786407767	0.029126213592233	0.0194174757281553	0.029126213592233	0.029126213592233	0.12621359223301	0.029126213592233	0.058252427184466	0.0194174757281553	0.029126213592233	0.0679611650485437	0.00970873786407767	0.029126213592233
-670	0.00943396226415094	0.00943396226415094	0.0283018867924528	0.00943396226415094	0.0188679245283019	0.0377358490566038	0.122641509433962	0.0377358490566038	0.0471698113207547	0.00943396226415094	0.0283018867924528	0.0566037735849057	0.0283018867924528	0.0377358490566038
-660	0.00925925925925926	0.0185185185185185	0.037037037037037	0.0185185185185185	0.0185185185185185	0.037037037037037	0.12962962962963	0.037037037037037	0.0462962962962963	0.00925925925925926	0.0462962962962963	0.0648148148148148	0.0277777777777778	0.0277777777777778
-650	0.00909090909090909	0.0181818181818182	0.0363636363636364	0.0181818181818182	0.0363636363636364	0.0363636363636364	0.109090909090909	0.0454545454545455	0.0636363636363636	0.00909090909090909	0.0454545454545455	0.0454545454545455	0.0363636363636364	0.0181818181818182
-640	0.0181818181818182	0.0181818181818182	0.0454545454545455	0.0181818181818182	0.0272727272727273	0.0272727272727273	0.154545454545455	0.0454545454545455	0.0727272727272727	0.0181818181818182	0.0454545454545455	0.0727272727272727	0.0363636363636364	0.0181818181818182
-630	0.0181818181818182	0.00909090909090909	0.0454545454545455	0.0272727272727273	0.0272727272727273	0.0454545454545455	0.136363636363636	0.0272727272727273	0.0818181818181818	0.0181818181818182	0.0363636363636364	0.0727272727272727	0.0272727272727273	0.0363636363636364
-620	0.0181818181818182	0.00909090909090909	0.0454545454545455	0	0.0272727272727273	0.0272727272727273	0.127272727272727	0.0272727272727273	0.0545454545454545	0.0454545454545455	0.0363636363636364	0.0727272727272727	0.0272727272727273	0.0272727272727273
-610	0.0272727272727273	0.00909090909090909	0.0363636363636364	0.00909090909090909	0.0181818181818182	0	0.136363636363636	0.0272727272727273	0.0545454545454545	0.0363636363636364	0.0454545454545455	0.0727272727272727	0.0181818181818182	0.0272727272727273
-600	0.0353982300884956	0.0176991150442478	0.0176991150442478	0.00884955752212389	0.00884955752212389	0	0.141592920353982	0.0176991150442478	0.0619469026548673	0.0353982300884956	0.0530973451327434	0.079646017699115	0.0176991150442478	0.0176991150442478
-590	0.0521739130434783	0.0347826086956522	0.0260869565217391	0.00869565217391304	0.0173913043478261	0	0.139130434782609	0.0347826086956522	0.0608695652173913	0.0260869565217391	0.0173913043478261	0.0869565217391304	0	0.0173913043478261
-580	0.0434782608695652	0.0347826086956522	0.0434782608695652	0.0173913043478261	0.0260869565217391	0.00869565217391304	0.147826086956522	0.0347826086956522	0.0608695652173913	0.0521739130434783	0.0260869565217391	0.0782608695652174	0.0173913043478261	0.0260869565217391
-570	0.0517241379310345	0.0344827586206897	0.0344827586206897	0.0258620689655172	0.0344827586206897	0	0.172413793103448	0.0258620689655172	0.103448275862069	0.0431034482758621	0.0431034482758621	0.0948275862068965	0.0431034482758621	0.0431034482758621
-560	0.0578512396694215	0.00826446280991736	0.0247933884297521	0.0247933884297521	0.0165289256198347	0	0.148760330578512	0.0330578512396694	0.107438016528926	0.0330578512396694	0.0413223140495868	0.0661157024793388	0.0247933884297521	0.0330578512396694
-550	0.0661157024793388	0.0247933884297521	0.0413223140495868	0.0247933884297521	0.0165289256198347	0.00826446280991736	0.132231404958678	0.0330578512396694	0.115702479338843	0.0330578512396694	0.0330578512396694	0.0743801652892562	0.0413223140495868	0.0165289256198347
-540	0.0578512396694215	0	0.0413223140495868	0.0165289256198347	0.0165289256198347	0.0247933884297521	0.148760330578512	0.0330578512396694	0.0991735537190083	0.0247933884297521	0.0413223140495868	0.0578512396694215	0.0495867768595041	0.0165289256198347
-530	0.0655737704918033	0.0163934426229508	0.0573770491803279	0.0163934426229508	0.0245901639344262	0.0163934426229508	0.155737704918033	0.0327868852459016	0.0983606557377049	0.0163934426229508	0.0327868852459016	0.0819672131147541	0.040983606557377	0.00819672131147541
-520	0.0655737704918033	0.00819672131147541	0.0491803278688525	0.0163934426229508	0.0245901639344262	0.0163934426229508	0.172131147540984	0.0491803278688525	0.0901639344262295	0.0245901639344262	0.0573770491803279	0.0737704918032787	0.040983606557377	0.0163934426229508
-510	0.0650406504065041	0.00813008130081301	0.040650406504065	0.016260162601626	0.024390243902439	0.00813008130081301	0.154471544715447	0.0487804878048781	0.0975609756097561	0.032520325203252	0.016260162601626	0.0569105691056911	0.024390243902439	0.024390243902439
-500	0.0725806451612903	0.0161290322580645	0.0483870967741935	0.032258064516129	0.0241935483870968	0.032258064516129	0.153225806451613	0.0645161290322581	0.0967741935483871	0.0241935483870968	0.0241935483870968	0.0483870967741935	0.0483870967741935	0.0161290322580645
-490	0.0793650793650794	0.0317460317460317	0.0634920634920635	0.0238095238095238	0.0238095238095238	0.0317460317460317	0.174603174603175	0.0555555555555556	0.111111111111111	0.0396825396825397	0.0317460317460317	0.0396825396825397	0.0634920634920635	0.0158730158730159
-480	0.0634920634920635	0.0158730158730159	0.0396825396825397	0.0158730158730159	0.0238095238095238	0.0158730158730159	0.174603174603175	0.0476190476190476	0.103174603174603	0.0317460317460317	0.0238095238095238	0.0396825396825397	0.0555555555555556	0.0238095238095238
-470	0.0952380952380952	0.0158730158730159	0.0396825396825397	0.00793650793650794	0.0238095238095238	0.0396825396825397	0.158730158730159	0.0714285714285714	0.0873015873015873	0.0238095238095238	0.0317460317460317	0.0476190476190476	0.0396825396825397	0.0158730158730159
-460	0.0952380952380952	0.0317460317460317	0.0396825396825397	0.0238095238095238	0.0158730158730159	0.0396825396825397	0.182539682539683	0.0634920634920635	0.111111111111111	0.0317460317460317	0.0396825396825397	0.0555555555555556	0.0396825396825397	0.0238095238095238
-450	0.103174603174603	0.0317460317460317	0.0317460317460317	0.0396825396825397	0.0238095238095238	0.0555555555555556	0.174603174603175	0.0714285714285714	0.119047619047619	0.0238095238095238	0.0396825396825397	0.0396825396825397	0.0317460317460317	0.0158730158730159
-440	0.0952380952380952	0.0238095238095238	0.0634920634920635	0.0555555555555556	0.0396825396825397	0.0476190476190476	0.174603174603175	0.0634920634920635	0.134920634920635	0.0238095238095238	0.0555555555555556	0.0476190476190476	0.0555555555555556	0.0238095238095238
-430	0.111111111111111	0.0238095238095238	0.0634920634920635	0.0634920634920635	0.0238095238095238	0.0476190476190476	0.174603174603175	0.0634920634920635	0.126984126984127	0.0317460317460317	0.0634920634920635	0.0555555555555556	0.0396825396825397	0.0158730158730159
-420	0.134920634920635	0.0238095238095238	0.0555555555555556	0.0555555555555556	0.0317460317460317	0.0476190476190476	0.182539682539683	0.0634920634920635	0.103174603174603	0.0158730158730159	0.0555555555555556	0.0396825396825397	0.0238095238095238	0.00793650793650794
-410	0.142857142857143	0.00793650793650794	0.0873015873015873	0.0476190476190476	0.0238095238095238	0.0317460317460317	0.150793650793651	0.0793650793650794	0.111111111111111	0.0158730158730159	0.0873015873015873	0.0476190476190476	0.0158730158730159	0.0158730158730159
-400	0.142857142857143	0.0317460317460317	0.0555555555555556	0.0476190476190476	0.0158730158730159	0.0238095238095238	0.166666666666667	0.0714285714285714	0.0873015873015873	0.0396825396825397	0.0555555555555556	0.0396825396825397	0.0158730158730159	0.00793650793650794
-390	0.174603174603175	0.0476190476190476	0.0714285714285714	0.0555555555555556	0.00793650793650794	0.0396825396825397	0.150793650793651	0.0634920634920635	0.111111111111111	0.0714285714285714	0.0555555555555556	0.0396825396825397	0.0317460317460317	0.00793650793650794
-380	0.166666666666667	0.0317460317460317	0.0634920634920635	0.0714285714285714	0.00793650793650794	0.0158730158730159	0.166666666666667	0.0555555555555556	0.126984126984127	0.0555555555555556	0.0634920634920635	0.0317460317460317	0.0476190476190476	0.0158730158730159
-370	0.206349206349206	0.0238095238095238	0.0634920634920635	0.0555555555555556	0.00793650793650794	0.0476190476190476	0.166666666666667	0.0793650793650794	0.134920634920635	0.0476190476190476	0.0634920634920635	0.0238095238095238	0.0476190476190476	0.00793650793650794
-360	0.222222222222222	0.0317460317460317	0.0634920634920635	0.0714285714285714	0	0.0476190476190476	0.19047619047619	0.0714285714285714	0.150793650793651	0.0317460317460317	0.0634920634920635	0.0317460317460317	0.0476190476190476	0
-350	0.222222222222222	0.0317460317460317	0.0714285714285714	0.0952380952380952	0.0158730158730159	0.0476190476190476	0.206349206349206	0.0873015873015873	0.126984126984127	0.0396825396825397	0.0714285714285714	0.0317460317460317	0.0396825396825397	0
-340	0.238095238095238	0.0238095238095238	0.0634920634920635	0.0714285714285714	0.0158730158730159	0.0476190476190476	0.182539682539683	0.0634920634920635	0.150793650793651	0.0396825396825397	0.0793650793650794	0.0555555555555556	0.0317460317460317	0
-330	0.253968253968254	0.0476190476190476	0.0555555555555556	0.0793650793650794	0.0158730158730159	0.0634920634920635	0.174603174603175	0.0793650793650794	0.142857142857143	0.0238095238095238	0.0555555555555556	0.0317460317460317	0.0396825396825397	0.00793650793650794
-320	0.246031746031746	0.0317460317460317	0.0634920634920635	0.0873015873015873	0.0158730158730159	0.0476190476190476	0.19047619047619	0.103174603174603	0.134920634920635	0.0238095238095238	0.0714285714285714	0.0317460317460317	0.0396825396825397	0.00793650793650794
-310	0.293650793650794	0.0555555555555556	0.0793650793650794	0.0793650793650794	0.0158730158730159	0.0317460317460317	0.198412698412698	0.0952380952380952	0.134920634920635	0.0476190476190476	0.0714285714285714	0.0317460317460317	0.0238095238095238	0.0158730158730159
-300	0.301587301587302	0.0476190476190476	0.0873015873015873	0.0555555555555556	0.00793650793650794	0.0396825396825397	0.19047619047619	0.0952380952380952	0.126984126984127	0.0396825396825397	0.0555555555555556	0.0396825396825397	0.0476190476190476	0.0158730158730159
-290	0.349206349206349	0.0396825396825397	0.0714285714285714	0.0714285714285714	0.00793650793650794	0.0555555555555556	0.182539682539683	0.0952380952380952	0.150793650793651	0.0317460317460317	0.0714285714285714	0.0238095238095238	0.0396825396825397	0.0158730158730159
-280	0.365079365079365	0.0634920634920635	0.0952380952380952	0.0873015873015873	0.00793650793650794	0.0555555555555556	0.158730158730159	0.103174603174603	0.134920634920635	0.0555555555555556	0.0634920634920635	0.0317460317460317	0.0396825396825397	0
-270	0.404761904761905	0.0634920634920635	0.0952380952380952	0.0952380952380952	0.0158730158730159	0.0793650793650794	0.174603174603175	0.119047619047619	0.142857142857143	0.0634920634920635	0.0873015873015873	0.0317460317460317	0.0555555555555556	0.00793650793650794
-260	0.428571428571429	0.0714285714285714	0.103174603174603	0.0952380952380952	0.0238095238095238	0.111111111111111	0.174603174603175	0.126984126984127	0.158730158730159	0.0396825396825397	0.0555555555555556	0.0317460317460317	0.0476190476190476	0
-250	0.46031746031746	0.0873015873015873	0.0714285714285714	0.103174603174603	0.0317460317460317	0.103174603174603	0.134920634920635	0.142857142857143	0.166666666666667	0.0476190476190476	0.0793650793650794	0.0396825396825397	0.0555555555555556	0.0158730158730159
-240	0.46031746031746	0.0793650793650794	0.0952380952380952	0.0873015873015873	0.0238095238095238	0.0873015873015873	0.111111111111111	0.126984126984127	0.158730158730159	0.0317460317460317	0.0555555555555556	0.0317460317460317	0.0476190476190476	0.0158730158730159
-230	0.476190476190476	0.0952380952380952	0.0873015873015873	0.0873015873015873	0.0317460317460317	0.0793650793650794	0.103174603174603	0.158730158730159	0.119047619047619	0.0396825396825397	0.0873015873015873	0.0238095238095238	0.0714285714285714	0.00793650793650794
-220	0.515873015873016	0.111111111111111	0.0714285714285714	0.111111111111111	0.0158730158730159	0.103174603174603	0.0952380952380952	0.158730158730159	0.150793650793651	0.0317460317460317	0.0555555555555556	0.0238095238095238	0.0476190476190476	0.0158730158730159
-210	0.547619047619048	0.111111111111111	0.103174603174603	0.119047619047619	0.0238095238095238	0.103174603174603	0.111111111111111	0.182539682539683	0.142857142857143	0.0476190476190476	0.0714285714285714	0.0317460317460317	0.0396825396825397	0.0158730158730159
-200	0.555555555555556	0.119047619047619	0.0555555555555556	0.126984126984127	0.0158730158730159	0.134920634920635	0.0952380952380952	0.174603174603175	0.158730158730159	0.0555555555555556	0.0555555555555556	0.0317460317460317	0.0555555555555556	0.0317460317460317
-190	0.571428571428571	0.126984126984127	0.0555555555555556	0.0952380952380952	0.0158730158730159	0.126984126984127	0.0714285714285714	0.182539682539683	0.166666666666667	0.0793650793650794	0.0476190476190476	0.0396825396825397	0.0555555555555556	0.0317460317460317
-180	0.563492063492063	0.134920634920635	0.0555555555555556	0.119047619047619	0.0158730158730159	0.134920634920635	0.0952380952380952	0.214285714285714	0.158730158730159	0.0714285714285714	0.0714285714285714	0.0396825396825397	0.0634920634920635	0.00793650793650794
-170	0.547619047619048	0.142857142857143	0.0793650793650794	0.119047619047619	0.0158730158730159	0.126984126984127	0.0634920634920635	0.23015873015873	0.126984126984127	0.0714285714285714	0.0634920634920635	0.0555555555555556	0.0555555555555556	0.0158730158730159
-160	0.547619047619048	0.142857142857143	0.0793650793650794	0.126984126984127	0.0238095238095238	0.126984126984127	0.0634920634920635	0.26984126984127	0.119047619047619	0.0634920634920635	0.0555555555555556	0.0555555555555556	0.0476190476190476	0.00793650793650794
-150	0.547619047619048	0.142857142857143	0.0873015873015873	0.119047619047619	0.00793650793650794	0.142857142857143	0.0634920634920635	0.285714285714286	0.0873015873015873	0.0793650793650794	0.0714285714285714	0.0634920634920635	0.0555555555555556	0
-140	0.547619047619048	0.134920634920635	0.0714285714285714	0.126984126984127	0.0158730158730159	0.150793650793651	0.0634920634920635	0.26984126984127	0.0952380952380952	0.0634920634920635	0.0873015873015873	0.0555555555555556	0.0317460317460317	0.0158730158730159
-130	0.53968253968254	0.142857142857143	0.0952380952380952	0.103174603174603	0.0158730158730159	0.150793650793651	0.0634920634920635	0.277777777777778	0.0952380952380952	0.0555555555555556	0.0555555555555556	0.0555555555555556	0.0476190476190476	0.0158730158730159
-120	0.555555555555556	0.150793650793651	0.0873015873015873	0.134920634920635	0.00793650793650794	0.142857142857143	0.0476190476190476	0.246031746031746	0.0952380952380952	0.0793650793650794	0.0555555555555556	0.0555555555555556	0.0476190476190476	0.00793650793650794
-110	0.571428571428571	0.19047619047619	0.0952380952380952	0.126984126984127	0.0238095238095238	0.134920634920635	0.0555555555555556	0.253968253968254	0.0952380952380952	0.0793650793650794	0.0476190476190476	0.0476190476190476	0.0555555555555556	0.00793650793650794
-100	0.547619047619048	0.174603174603175	0.0793650793650794	0.119047619047619	0.0238095238095238	0.119047619047619	0.0555555555555556	0.277777777777778	0.0952380952380952	0.0873015873015873	0.0476190476190476	0.0476190476190476	0.0555555555555556	0.0158730158730159
-90	0.579365079365079	0.198412698412698	0.0873015873015873	0.111111111111111	0.0238095238095238	0.111111111111111	0.0476190476190476	0.238095238095238	0.0873015873015873	0.0714285714285714	0.0555555555555556	0.0317460317460317	0.0476190476190476	0.0158730158730159
-80	0.595238095238095	0.198412698412698	0.0793650793650794	0.134920634920635	0.0158730158730159	0.119047619047619	0.0714285714285714	0.253968253968254	0.0714285714285714	0.0634920634920635	0.0317460317460317	0.0396825396825397	0.0555555555555556	0.0158730158730159
-70	0.595238095238095	0.206349206349206	0.111111111111111	0.0793650793650794	0.0317460317460317	0.111111111111111	0.0555555555555556	0.246031746031746	0.0952380952380952	0.0634920634920635	0.0238095238095238	0.0317460317460317	0.0476190476190476	0.0317460317460317
-60	0.603174603174603	0.206349206349206	0.119047619047619	0.0952380952380952	0.0238095238095238	0.0952380952380952	0.0714285714285714	0.222222222222222	0.0793650793650794	0.0555555555555556	0.0238095238095238	0.0555555555555556	0.0317460317460317	0.0476190476190476
-50	0.603174603174603	0.214285714285714	0.103174603174603	0.0714285714285714	0.0238095238095238	0.111111111111111	0.0714285714285714	0.23015873015873	0.0952380952380952	0.0476190476190476	0.0317460317460317	0.0555555555555556	0.0396825396825397	0.0396825396825397
-40	0.611111111111111	0.214285714285714	0.103174603174603	0.0873015873015873	0.0317460317460317	0.111111111111111	0.0793650793650794	0.198412698412698	0.0793650793650794	0.0476190476190476	0.0396825396825397	0.0555555555555556	0.0396825396825397	0.0317460317460317
-30	0.603174603174603	0.222222222222222	0.0873015873015873	0.0476190476190476	0.0396825396825397	0.0873015873015873	0.0714285714285714	0.198412698412698	0.0714285714285714	0.0555555555555556	0.0238095238095238	0.0634920634920635	0.0396825396825397	0.0238095238095238
-20	0.587301587301587	0.222222222222222	0.0793650793650794	0.0793650793650794	0.0396825396825397	0.111111111111111	0.0634920634920635	0.198412698412698	0.0634920634920635	0.0555555555555556	0.0476190476190476	0.0634920634920635	0.0317460317460317	0.0317460317460317
-10	0.603174603174603	0.253968253968254	0.0793650793650794	0.0634920634920635	0.0396825396825397	0.103174603174603	0.0714285714285714	0.166666666666667	0.0634920634920635	0.0555555555555556	0.0476190476190476	0.0396825396825397	0.0317460317460317	0.0238095238095238
0	0.555555555555556	0.26984126984127	0.103174603174603	0.0555555555555556	0.0476190476190476	0.0793650793650794	0.0714285714285714	0.150793650793651	0.0714285714285714	0.0634920634920635	0.0396825396825397	0.0555555555555556	0.0317460317460317	0.0238095238095238
10	0.547619047619048	0.285714285714286	0.103174603174603	0.0476190476190476	0.0396825396825397	0.0952380952380952	0.0714285714285714	0.111111111111111	0.0873015873015873	0.0634920634920635	0.0238095238095238	0.0555555555555556	0.0396825396825397	0.00793650793650794
20	0.547619047619048	0.301587301587302	0.111111111111111	0.0476190476190476	0.0396825396825397	0.0634920634920635	0.0634920634920635	0.119047619047619	0.0714285714285714	0.0396825396825397	0.0238095238095238	0.0476190476190476	0.0317460317460317	0.0238095238095238
30	0.563492063492063	0.30952380952381	0.0873015873015873	0.0396825396825397	0.0396825396825397	0.0634920634920635	0.0634920634920635	0.0952380952380952	0.0873015873015873	0.0555555555555556	0.0317460317460317	0.0555555555555556	0.0317460317460317	0.0396825396825397
40	0.555555555555556	0.317460317460317	0.103174603174603	0.0555555555555556	0.0476190476190476	0.0476190476190476	0.0714285714285714	0.0714285714285714	0.0793650793650794	0.0476190476190476	0.0317460317460317	0.0634920634920635	0.0396825396825397	0.0396825396825397
50	0.547619047619048	0.317460317460317	0.0873015873015873	0.0634920634920635	0.0476190476190476	0.0317460317460317	0.0555555555555556	0.0873015873015873	0.0634920634920635	0.0793650793650794	0.0238095238095238	0.0555555555555556	0.0476190476190476	0.0317460317460317
60	0.53968253968254	0.325396825396825	0.119047619047619	0.0714285714285714	0.0555555555555556	0.0634920634920635	0.0634920634920635	0.0952380952380952	0.111111111111111	0.0634920634920635	0.00793650793650794	0.0555555555555556	0.0476190476190476	0.0555555555555556
70	0.523809523809524	0.357142857142857	0.103174603174603	0.0634920634920635	0.0476190476190476	0.0714285714285714	0.0476190476190476	0.0873015873015873	0.0952380952380952	0.0714285714285714	0.0158730158730159	0.0476190476190476	0.0555555555555556	0.0555555555555556
80	0.515873015873016	0.341269841269841	0.0952380952380952	0.0634920634920635	0.0714285714285714	0.0396825396825397	0.0317460317460317	0.0634920634920635	0.0952380952380952	0.0555555555555556	0.0158730158730159	0.0317460317460317	0.0476190476190476	0.0555555555555556
90	0.5	0.349206349206349	0.103174603174603	0.0476190476190476	0.0714285714285714	0.0555555555555556	0.0476190476190476	0.0634920634920635	0.103174603174603	0.0555555555555556	0.00793650793650794	0.0317460317460317	0.0555555555555556	0.0476190476190476
100	0.492063492063492	0.357142857142857	0.0714285714285714	0.0476190476190476	0.0476190476190476	0.0476190476190476	0.0476190476190476	0.0714285714285714	0.0952380952380952	0.0634920634920635	0.0158730158730159	0.0238095238095238	0.0555555555555556	0.0634920634920635
110	0.476190476190476	0.373015873015873	0.0873015873015873	0.0476190476190476	0.0714285714285714	0.0555555555555556	0.0634920634920635	0.0476190476190476	0.0952380952380952	0.0714285714285714	0.00793650793650794	0.0238095238095238	0.0396825396825397	0.0793650793650794
120	0.444444444444444	0.380952380952381	0.119047619047619	0.0158730158730159	0.0555555555555556	0.0396825396825397	0.0555555555555556	0.0476190476190476	0.103174603174603	0.0476190476190476	0.0158730158730159	0.0317460317460317	0.0634920634920635	0.0634920634920635
130	0.428571428571429	0.388888888888889	0.111111111111111	0.0238095238095238	0.0476190476190476	0.0317460317460317	0.0476190476190476	0.0634920634920635	0.103174603174603	0.0476190476190476	0.00793650793650794	0.0476190476190476	0.0555555555555556	0.0555555555555556
140	0.404761904761905	0.388888888888889	0.0873015873015873	0.0396825396825397	0.0476190476190476	0.0317460317460317	0.0476190476190476	0.0634920634920635	0.126984126984127	0.0555555555555556	0.0158730158730159	0.0476190476190476	0.0396825396825397	0.0634920634920635
150	0.388888888888889	0.388888888888889	0.111111111111111	0.0317460317460317	0.0317460317460317	0.0476190476190476	0.0396825396825397	0.0476190476190476	0.0793650793650794	0.0555555555555556	0.0238095238095238	0.0396825396825397	0.0317460317460317	0.0476190476190476
160	0.373015873015873	0.396825396825397	0.0873015873015873	0.0317460317460317	0.0238095238095238	0.0476190476190476	0.0396825396825397	0.0396825396825397	0.0952380952380952	0.0555555555555556	0.00793650793650794	0.0476190476190476	0.0396825396825397	0.0714285714285714
170	0.357142857142857	0.412698412698413	0.0952380952380952	0.0158730158730159	0.0238095238095238	0.0555555555555556	0.0476190476190476	0.0476190476190476	0.103174603174603	0.0793650793650794	0.00793650793650794	0.0317460317460317	0.0238095238095238	0.0634920634920635
180	0.357142857142857	0.436507936507937	0.0952380952380952	0.0238095238095238	0.0238095238095238	0.0555555555555556	0.0396825396825397	0.0317460317460317	0.0873015873015873	0.0873015873015873	0.0238095238095238	0.0396825396825397	0.0238095238095238	0.0873015873015873
190	0.333333333333333	0.444444444444444	0.111111111111111	0.00793650793650794	0.0238095238095238	0.0555555555555556	0.0476190476190476	0.0238095238095238	0.111111111111111	0.0952380952380952	0.0238095238095238	0.0476190476190476	0.0317460317460317	0.0634920634920635
200	0.341269841269841	0.468253968253968	0.103174603174603	0.00793650793650794	0.0238095238095238	0.0396825396825397	0.0634920634920635	0.0238095238095238	0.0793650793650794	0.103174603174603	0.0317460317460317	0.0396825396825397	0.0317460317460317	0.0634920634920635
210	0.317460317460317	0.452380952380952	0.111111111111111	0.0158730158730159	0.0158730158730159	0.0714285714285714	0.0714285714285714	0.0317460317460317	0.0634920634920635	0.119047619047619	0.0317460317460317	0.0396825396825397	0.0317460317460317	0.0793650793650794
220	0.30952380952381	0.444444444444444	0.111111111111111	0.00793650793650794	0.0158730158730159	0.0555555555555556	0.0634920634920635	0.0555555555555556	0.0555555555555556	0.0873015873015873	0.0317460317460317	0.0476190476190476	0.0317460317460317	0.0714285714285714
230	0.277777777777778	0.476190476190476	0.111111111111111	0.0238095238095238	0.0158730158730159	0.0555555555555556	0.0634920634920635	0.0396825396825397	0.0396825396825397	0.0793650793650794	0.0158730158730159	0.0476190476190476	0.0238095238095238	0.0793650793650794
240	0.285714285714286	0.484126984126984	0.134920634920635	0.0158730158730159	0.0238095238095238	0.0555555555555556	0.0476190476190476	0.0317460317460317	0.0476190476190476	0.0634920634920635	0.0238095238095238	0.0317460317460317	0.0158730158730159	0.119047619047619
250	NaN	NaN	NaN	NaN	NaN	NaN	NaN	NaN	NaN	NaN	NaN	NaN	NaN	NaN
260	NaN	NaN	NaN	NaN	NaN	NaN	NaN	NaN	NaN	NaN	NaN	NaN	NaN	NaN
270	NaN	NaN	NaN	NaN	NaN	NaN	NaN	NaN	NaN	NaN	NaN	NaN	NaN	NaN
280	NaN	NaN	NaN	NaN	NaN	NaN	NaN	NaN	NaN	NaN	NaN	NaN	NaN	NaN
290	NaN	NaN	NaN	NaN	NaN	NaN	NaN	NaN	NaN	NaN	NaN	NaN	NaN	NaN
300	NaN	NaN	NaN	NaN	NaN	NaN	NaN	NaN	NaN	NaN	NaN	NaN	NaN	NaN
