# Supplementary material for: Frontal eye field and caudate neurons make different contributions to reward-biased perceptual decisions
Source: eLife. 2020 Nov 27;9:e60535. doi: 10.7554/eLife.60535 (PMC7695458; doi:10.7554/eLife.60535)
Supplement: Figure 3—source data 7. [file elife-60535-fig3-data7.csv]

time	Choice_pos	Choice_neg	Rewcont_pos	Rewcont_neg	Rewsize_pos	Rewsize_neg	RTnorm1_pos	RTnorm1_neg	RTnorm2_pos	RTnorm2_neg	RTnormRewSize1_pos	RTnormRewSize1_neg	RTnormRewsize2_pos	RTnormRewsize2_neg
-800	0.104	0.024	0.056	0.024	0.008	0.024	0.064	0.04	0.048	0.056	0.016	0.048	0.04	0.024
-790	0.119047619047619	0.0238095238095238	0.0634920634920635	0.0238095238095238	0.00793650793650794	0.0476190476190476	0.0555555555555556	0.0396825396825397	0.0555555555555556	0.0476190476190476	0.0158730158730159	0.0476190476190476	0.0555555555555556	0.0158730158730159
-780	0.103174603174603	0.0317460317460317	0.0555555555555556	0.0396825396825397	0.0238095238095238	0.0555555555555556	0.0396825396825397	0.0476190476190476	0.0555555555555556	0.0634920634920635	0.0158730158730159	0.0634920634920635	0.0476190476190476	0.0158730158730159
-770	0.103174603174603	0.0238095238095238	0.0396825396825397	0.0555555555555556	0.0158730158730159	0.0555555555555556	0.0396825396825397	0.0555555555555556	0.0476190476190476	0.0714285714285714	0.0158730158730159	0.0555555555555556	0.0476190476190476	0.0158730158730159
-760	0.118110236220472	0.015748031496063	0.0551181102362205	0.047244094488189	0.0078740157480315	0.047244094488189	0.047244094488189	0.0708661417322835	0.0551181102362205	0.047244094488189	0.015748031496063	0.047244094488189	0.047244094488189	0.015748031496063
-750	0.110236220472441	0.0236220472440945	0.047244094488189	0.031496062992126	0.0236220472440945	0.0393700787401575	0.0393700787401575	0.0708661417322835	0.078740157480315	0.047244094488189	0.0236220472440945	0.047244094488189	0.047244094488189	0.0236220472440945
-740	0.102362204724409	0.0393700787401575	0.031496062992126	0.031496062992126	0.0236220472440945	0.0393700787401575	0.047244094488189	0.0866141732283465	0.047244094488189	0.047244094488189	0.015748031496063	0.0551181102362205	0.0551181102362205	0.015748031496063
-730	0.1015625	0.03125	0.0625	0.046875	0.03125	0.0546875	0.03125	0.0859375	0.0859375	0.0625	0.0078125	0.0546875	0.0546875	0.015625
-720	0.109375	0.03125	0.0625	0.0390625	0.03125	0.0390625	0.046875	0.0703125	0.078125	0.046875	0.015625	0.046875	0.046875	0.0078125
-710	0.0984848484848485	0.0227272727272727	0.0378787878787879	0.0378787878787879	0.0227272727272727	0.053030303030303	0.0378787878787879	0.0833333333333333	0.0681818181818182	0.053030303030303	0.0227272727272727	0.0681818181818182	0.0454545454545455	0.0227272727272727
-700	0.0984848484848485	0.0454545454545455	0.0454545454545455	0.0303030303030303	0.0303030303030303	0.0378787878787879	0.0454545454545455	0.0909090909090909	0.0454545454545455	0.0606060606060606	0.0151515151515152	0.0757575757575758	0.053030303030303	0.0303030303030303
-690	0.106060606060606	0.0378787878787879	0.0454545454545455	0.0378787878787879	0.0378787878787879	0.0681818181818182	0.0454545454545455	0.0833333333333333	0.053030303030303	0.053030303030303	0.00757575757575758	0.0757575757575758	0.053030303030303	0.0378787878787879
-680	0.105263157894737	0.0601503759398496	0.0300751879699248	0.0676691729323308	0.0676691729323308	0.037593984962406	0.0451127819548872	0.105263157894737	0.037593984962406	0.0676691729323308	0.0150375939849624	0.0902255639097744	0.0300751879699248	0.0601503759398496
-670	0.111940298507463	0.0447761194029851	0.0522388059701493	0.0447761194029851	0.0522388059701493	0.0597014925373134	0.0447761194029851	0.0895522388059701	0.0373134328358209	0.0597014925373134	0	0.082089552238806	0.0373134328358209	0.0373134328358209
-660	0.117647058823529	0.0514705882352941	0.0514705882352941	0.0514705882352941	0.0367647058823529	0.0441176470588235	0.0367647058823529	0.125	0.0367647058823529	0.0661764705882353	0.00735294117647059	0.0735294117647059	0.0367647058823529	0.0367647058823529
-650	0.0955882352941176	0.0735294117647059	0.0441176470588235	0.0367647058823529	0.0367647058823529	0.0367647058823529	0.0367647058823529	0.117647058823529	0.0367647058823529	0.0661764705882353	0.00735294117647059	0.0808823529411765	0.0367647058823529	0.0367647058823529
-640	0.102941176470588	0.0588235294117647	0.0367647058823529	0.0294117647058824	0.0514705882352941	0.0367647058823529	0.0294117647058824	0.0955882352941176	0.0514705882352941	0.0661764705882353	0	0.0588235294117647	0.0514705882352941	0.0367647058823529
-630	0.0808823529411765	0.0514705882352941	0.0294117647058824	0.0294117647058824	0.0294117647058824	0.0294117647058824	0.0441176470588235	0.102941176470588	0.0588235294117647	0.0735294117647059	0	0.0588235294117647	0.0514705882352941	0.0220588235294118
-620	0.0955882352941176	0.0514705882352941	0.0514705882352941	0.0220588235294118	0.0220588235294118	0.0294117647058824	0.0588235294117647	0.0882352941176471	0.0735294117647059	0.0588235294117647	0	0.0588235294117647	0.0588235294117647	0.0220588235294118
-610	0.117647058823529	0.0514705882352941	0.0808823529411765	0.0367647058823529	0.0147058823529412	0.0294117647058824	0.0441176470588235	0.0955882352941176	0.0735294117647059	0.0735294117647059	0.0147058823529412	0.0514705882352941	0.0661764705882353	0.0294117647058824
-600	0.102941176470588	0.0735294117647059	0.0661764705882353	0.0441176470588235	0.0367647058823529	0.0220588235294118	0.0367647058823529	0.102941176470588	0.0514705882352941	0.0955882352941176	0	0.0588235294117647	0.0514705882352941	0.0294117647058824
-590	0.0882352941176471	0.0808823529411765	0.0588235294117647	0.0367647058823529	0.0441176470588235	0.00735294117647059	0.0367647058823529	0.0808823529411765	0.0367647058823529	0.0955882352941176	0.00735294117647059	0.0588235294117647	0.0294117647058824	0.0294117647058824
-580	0.0955882352941176	0.0661764705882353	0.0661764705882353	0.0367647058823529	0.0220588235294118	0.0147058823529412	0.0514705882352941	0.110294117647059	0.0367647058823529	0.0882352941176471	0.0147058823529412	0.0514705882352941	0.0220588235294118	0.0441176470588235
-570	0.110294117647059	0.0955882352941176	0.0735294117647059	0.0514705882352941	0.0367647058823529	0.0220588235294118	0.0441176470588235	0.0955882352941176	0.0514705882352941	0.0955882352941176	0.0294117647058824	0.0588235294117647	0.0294117647058824	0.0367647058823529
-560	0.0882352941176471	0.0882352941176471	0.0661764705882353	0.0441176470588235	0.0441176470588235	0.0220588235294118	0.0514705882352941	0.102941176470588	0.0661764705882353	0.0955882352941176	0.0147058823529412	0.0514705882352941	0.0514705882352941	0.0514705882352941
-550	0.0882352941176471	0.0735294117647059	0.0808823529411765	0.0367647058823529	0.0367647058823529	0.0220588235294118	0.0367647058823529	0.102941176470588	0.0735294117647059	0.0882352941176471	0.0147058823529412	0.0661764705882353	0.0367647058823529	0.0588235294117647
-540	0.0955882352941176	0.0661764705882353	0.0808823529411765	0.0367647058823529	0.0441176470588235	0.0147058823529412	0.0514705882352941	0.102941176470588	0.0661764705882353	0.0882352941176471	0.0220588235294118	0.0588235294117647	0.0441176470588235	0.0514705882352941
-530	0.0955882352941176	0.0661764705882353	0.0808823529411765	0.0147058823529412	0.0514705882352941	0.0367647058823529	0.0588235294117647	0.0955882352941176	0.0735294117647059	0.0808823529411765	0.00735294117647059	0.0808823529411765	0.0441176470588235	0.0367647058823529
-520	0.102941176470588	0.0661764705882353	0.0735294117647059	0.0441176470588235	0.0514705882352941	0.0367647058823529	0.0441176470588235	0.0955882352941176	0.0735294117647059	0.0808823529411765	0.0220588235294118	0.0735294117647059	0.0514705882352941	0.0441176470588235
-510	0.102941176470588	0.0808823529411765	0.0588235294117647	0.0514705882352941	0.0367647058823529	0.0367647058823529	0.0514705882352941	0.0955882352941176	0.0661764705882353	0.0808823529411765	0.0220588235294118	0.0735294117647059	0.0220588235294118	0.0588235294117647
-500	0.110294117647059	0.0808823529411765	0.0661764705882353	0.0808823529411765	0.0367647058823529	0.0441176470588235	0.0441176470588235	0.110294117647059	0.0735294117647059	0.0808823529411765	0.0220588235294118	0.0661764705882353	0.0367647058823529	0.0588235294117647
-490	0.117647058823529	0.0735294117647059	0.0514705882352941	0.0808823529411765	0.0220588235294118	0.0294117647058824	0.0367647058823529	0.117647058823529	0.0588235294117647	0.0882352941176471	0.0220588235294118	0.0514705882352941	0.0367647058823529	0.0441176470588235
-480	0.117647058823529	0.0735294117647059	0.0514705882352941	0.0735294117647059	0.0220588235294118	0.0367647058823529	0.0441176470588235	0.117647058823529	0.0588235294117647	0.0955882352941176	0.0367647058823529	0.0735294117647059	0.0367647058823529	0.0514705882352941
-470	0.117647058823529	0.0661764705882353	0.0441176470588235	0.0882352941176471	0.0220588235294118	0.0294117647058824	0.0514705882352941	0.125	0.0441176470588235	0.0882352941176471	0.0367647058823529	0.102941176470588	0.0294117647058824	0.0441176470588235
-460	0.117647058823529	0.0808823529411765	0.0367647058823529	0.0882352941176471	0.0294117647058824	0.0220588235294118	0.0441176470588235	0.110294117647059	0.0441176470588235	0.0882352941176471	0.0441176470588235	0.0735294117647059	0.0147058823529412	0.0367647058823529
-450	0.117647058823529	0.0882352941176471	0.0735294117647059	0.0808823529411765	0.0367647058823529	0.0220588235294118	0.0514705882352941	0.132352941176471	0.0735294117647059	0.0882352941176471	0.0514705882352941	0.0882352941176471	0.0441176470588235	0.0588235294117647
-440	0.117647058823529	0.0882352941176471	0.0588235294117647	0.117647058823529	0.0220588235294118	0.0294117647058824	0.0441176470588235	0.147058823529412	0.0882352941176471	0.110294117647059	0.0514705882352941	0.0955882352941176	0.0588235294117647	0.0661764705882353
-430	0.117647058823529	0.102941176470588	0.0661764705882353	0.125	0.0294117647058824	0.0441176470588235	0.0588235294117647	0.132352941176471	0.0882352941176471	0.132352941176471	0.0441176470588235	0.0882352941176471	0.0367647058823529	0.0514705882352941
-420	0.139705882352941	0.117647058823529	0.0955882352941176	0.110294117647059	0.0294117647058824	0.0367647058823529	0.0661764705882353	0.132352941176471	0.102941176470588	0.132352941176471	0.0441176470588235	0.0882352941176471	0.0588235294117647	0.0514705882352941
-410	0.169117647058824	0.110294117647059	0.0955882352941176	0.132352941176471	0.0367647058823529	0.0441176470588235	0.0514705882352941	0.139705882352941	0.110294117647059	0.139705882352941	0.0367647058823529	0.0955882352941176	0.0661764705882353	0.0441176470588235
-400	0.154411764705882	0.102941176470588	0.0955882352941176	0.139705882352941	0.0147058823529412	0.0661764705882353	0.0441176470588235	0.169117647058824	0.102941176470588	0.117647058823529	0.0294117647058824	0.0808823529411765	0.0882352941176471	0.0367647058823529
-390	0.147058823529412	0.0955882352941176	0.0882352941176471	0.132352941176471	0.0294117647058824	0.0661764705882353	0.0441176470588235	0.161764705882353	0.102941176470588	0.117647058823529	0.0294117647058824	0.0588235294117647	0.0588235294117647	0.0441176470588235
-380	0.169117647058824	0.139705882352941	0.102941176470588	0.154411764705882	0.0147058823529412	0.0441176470588235	0.0661764705882353	0.154411764705882	0.0955882352941176	0.125	0.0514705882352941	0.0735294117647059	0.0735294117647059	0.0220588235294118
-370	0.161764705882353	0.132352941176471	0.102941176470588	0.147058823529412	0.0441176470588235	0.0514705882352941	0.0514705882352941	0.169117647058824	0.110294117647059	0.117647058823529	0.0367647058823529	0.0735294117647059	0.0588235294117647	0.0220588235294118
-360	0.183823529411765	0.147058823529412	0.125	0.147058823529412	0.0441176470588235	0.0441176470588235	0.0588235294117647	0.169117647058824	0.110294117647059	0.110294117647059	0.0367647058823529	0.0735294117647059	0.0588235294117647	0.0294117647058824
-350	0.161764705882353	0.147058823529412	0.139705882352941	0.154411764705882	0.0661764705882353	0.0661764705882353	0.0661764705882353	0.161764705882353	0.0808823529411765	0.110294117647059	0.0588235294117647	0.0735294117647059	0.0661764705882353	0.0514705882352941
-340	0.191176470588235	0.183823529411765	0.154411764705882	0.176470588235294	0.0735294117647059	0.0808823529411765	0.0808823529411765	0.191176470588235	0.0661764705882353	0.102941176470588	0.0661764705882353	0.0808823529411765	0.0514705882352941	0.0514705882352941
-330	0.169117647058824	0.161764705882353	0.169117647058824	0.198529411764706	0.0882352941176471	0.0588235294117647	0.102941176470588	0.176470588235294	0.0808823529411765	0.102941176470588	0.0588235294117647	0.0808823529411765	0.0588235294117647	0.0441176470588235
-320	0.198529411764706	0.198529411764706	0.154411764705882	0.191176470588235	0.0588235294117647	0.0514705882352941	0.0955882352941176	0.176470588235294	0.0661764705882353	0.132352941176471	0.0661764705882353	0.0955882352941176	0.0588235294117647	0.0514705882352941
-310	0.176470588235294	0.191176470588235	0.154411764705882	0.191176470588235	0.0735294117647059	0.0808823529411765	0.0882352941176471	0.176470588235294	0.0735294117647059	0.125	0.0367647058823529	0.102941176470588	0.0441176470588235	0.0661764705882353
-300	0.191176470588235	0.183823529411765	0.154411764705882	0.198529411764706	0.0735294117647059	0.102941176470588	0.0882352941176471	0.161764705882353	0.0808823529411765	0.102941176470588	0.0294117647058824	0.0882352941176471	0.0661764705882353	0.0514705882352941
-290	0.227941176470588	0.205882352941176	0.139705882352941	0.191176470588235	0.0808823529411765	0.117647058823529	0.0955882352941176	0.169117647058824	0.0808823529411765	0.0955882352941176	0.0294117647058824	0.102941176470588	0.0588235294117647	0.0661764705882353
-280	0.227941176470588	0.213235294117647	0.176470588235294	0.205882352941176	0.0808823529411765	0.125	0.102941176470588	0.183823529411765	0.0735294117647059	0.0955882352941176	0.0514705882352941	0.0735294117647059	0.0514705882352941	0.0808823529411765
-270	0.220588235294118	0.220588235294118	0.169117647058824	0.205882352941176	0.0882352941176471	0.110294117647059	0.0955882352941176	0.213235294117647	0.102941176470588	0.102941176470588	0.0367647058823529	0.0735294117647059	0.0441176470588235	0.0661764705882353
-260	0.235294117647059	0.227941176470588	0.191176470588235	0.213235294117647	0.0882352941176471	0.132352941176471	0.0955882352941176	0.198529411764706	0.0882352941176471	0.139705882352941	0.0441176470588235	0.0661764705882353	0.0661764705882353	0.0588235294117647
-250	0.25	0.235294117647059	0.176470588235294	0.213235294117647	0.102941176470588	0.147058823529412	0.0808823529411765	0.213235294117647	0.0882352941176471	0.161764705882353	0.0588235294117647	0.0661764705882353	0.0588235294117647	0.0588235294117647
-240	0.242647058823529	0.235294117647059	0.176470588235294	0.191176470588235	0.117647058823529	0.132352941176471	0.0955882352941176	0.213235294117647	0.0808823529411765	0.139705882352941	0.0514705882352941	0.0735294117647059	0.0661764705882353	0.0588235294117647
-230	0.272058823529412	0.242647058823529	0.176470588235294	0.220588235294118	0.102941176470588	0.132352941176471	0.0808823529411765	0.205882352941176	0.0808823529411765	0.154411764705882	0.0441176470588235	0.102941176470588	0.0661764705882353	0.0441176470588235
-220	0.272058823529412	0.235294117647059	0.205882352941176	0.25	0.102941176470588	0.125	0.0882352941176471	0.213235294117647	0.0808823529411765	0.139705882352941	0.0514705882352941	0.0882352941176471	0.0735294117647059	0.0514705882352941
-210	0.272058823529412	0.242647058823529	0.198529411764706	0.213235294117647	0.0955882352941176	0.132352941176471	0.0882352941176471	0.220588235294118	0.0808823529411765	0.147058823529412	0.0441176470588235	0.0955882352941176	0.0808823529411765	0.0367647058823529
-200	0.272058823529412	0.242647058823529	0.198529411764706	0.205882352941176	0.0955882352941176	0.132352941176471	0.0808823529411765	0.213235294117647	0.0882352941176471	0.147058823529412	0.0588235294117647	0.0882352941176471	0.0882352941176471	0.0441176470588235
-190	0.279411764705882	0.235294117647059	0.191176470588235	0.235294117647059	0.102941176470588	0.117647058823529	0.0808823529411765	0.227941176470588	0.0955882352941176	0.147058823529412	0.0441176470588235	0.0955882352941176	0.0808823529411765	0.0441176470588235
-180	0.294117647058824	0.235294117647059	0.213235294117647	0.235294117647059	0.0882352941176471	0.139705882352941	0.0882352941176471	0.205882352941176	0.0882352941176471	0.154411764705882	0.0441176470588235	0.0882352941176471	0.0735294117647059	0.0367647058823529
-170	0.294117647058824	0.227941176470588	0.183823529411765	0.220588235294118	0.117647058823529	0.176470588235294	0.0955882352941176	0.205882352941176	0.0955882352941176	0.147058823529412	0.0514705882352941	0.0808823529411765	0.0882352941176471	0.0588235294117647
-160	0.316176470588235	0.257352941176471	0.176470588235294	0.213235294117647	0.132352941176471	0.169117647058824	0.0808823529411765	0.220588235294118	0.102941176470588	0.147058823529412	0.0441176470588235	0.0882352941176471	0.0955882352941176	0.0588235294117647
-150	0.308823529411765	0.264705882352941	0.161764705882353	0.242647058823529	0.132352941176471	0.161764705882353	0.0735294117647059	0.205882352941176	0.102941176470588	0.132352941176471	0.0588235294117647	0.0955882352941176	0.0955882352941176	0.0514705882352941
-140	0.338235294117647	0.257352941176471	0.169117647058824	0.235294117647059	0.139705882352941	0.147058823529412	0.0808823529411765	0.220588235294118	0.0955882352941176	0.132352941176471	0.0588235294117647	0.0588235294117647	0.0808823529411765	0.0661764705882353
-130	0.338235294117647	0.264705882352941	0.169117647058824	0.235294117647059	0.125	0.139705882352941	0.0661764705882353	0.205882352941176	0.102941176470588	0.117647058823529	0.0367647058823529	0.0808823529411765	0.0661764705882353	0.0588235294117647
-120	0.330882352941176	0.257352941176471	0.161764705882353	0.205882352941176	0.132352941176471	0.154411764705882	0.0661764705882353	0.176470588235294	0.0882352941176471	0.132352941176471	0.0514705882352941	0.0808823529411765	0.0735294117647059	0.0367647058823529
-110	0.345588235294118	0.25	0.154411764705882	0.213235294117647	0.132352941176471	0.139705882352941	0.0588235294117647	0.169117647058824	0.0955882352941176	0.117647058823529	0.0588235294117647	0.0808823529411765	0.0588235294117647	0.0294117647058824
-100	0.367647058823529	0.257352941176471	0.161764705882353	0.198529411764706	0.110294117647059	0.132352941176471	0.0661764705882353	0.198529411764706	0.0882352941176471	0.110294117647059	0.0661764705882353	0.0882352941176471	0.0514705882352941	0.0367647058823529
-90	0.389705882352941	0.25	0.161764705882353	0.176470588235294	0.110294117647059	0.139705882352941	0.0735294117647059	0.198529411764706	0.0882352941176471	0.125	0.0514705882352941	0.0735294117647059	0.0588235294117647	0.0441176470588235
-80	0.367647058823529	0.25	0.154411764705882	0.161764705882353	0.0882352941176471	0.139705882352941	0.0882352941176471	0.227941176470588	0.0882352941176471	0.125	0.0588235294117647	0.0735294117647059	0.0661764705882353	0.0367647058823529
-70	0.389705882352941	0.264705882352941	0.139705882352941	0.161764705882353	0.0882352941176471	0.132352941176471	0.0661764705882353	0.205882352941176	0.0955882352941176	0.102941176470588	0.0514705882352941	0.0735294117647059	0.0441176470588235	0.0367647058823529
-60	0.389705882352941	0.257352941176471	0.125	0.154411764705882	0.102941176470588	0.110294117647059	0.0808823529411765	0.205882352941176	0.0955882352941176	0.102941176470588	0.0661764705882353	0.0514705882352941	0.0514705882352941	0.0441176470588235
-50	0.389705882352941	0.264705882352941	0.117647058823529	0.161764705882353	0.117647058823529	0.117647058823529	0.0661764705882353	0.139705882352941	0.0955882352941176	0.0955882352941176	0.0441176470588235	0.0514705882352941	0.0661764705882353	0.0367647058823529
-40	0.411764705882353	0.25	0.110294117647059	0.154411764705882	0.0882352941176471	0.110294117647059	0.0661764705882353	0.117647058823529	0.0955882352941176	0.0882352941176471	0.0441176470588235	0.0588235294117647	0.0514705882352941	0.0367647058823529
-30	0.389705882352941	0.257352941176471	0.117647058823529	0.169117647058824	0.0808823529411765	0.110294117647059	0.0514705882352941	0.132352941176471	0.102941176470588	0.0661764705882353	0.0588235294117647	0.0514705882352941	0.0367647058823529	0.0294117647058824
-20	0.397058823529412	0.257352941176471	0.125	0.154411764705882	0.0735294117647059	0.102941176470588	0.0661764705882353	0.110294117647059	0.117647058823529	0.0588235294117647	0.0661764705882353	0.0661764705882353	0.0441176470588235	0.0294117647058824
-10	0.404411764705882	0.25	0.132352941176471	0.169117647058824	0.132352941176471	0.110294117647059	0.0808823529411765	0.117647058823529	0.132352941176471	0.0808823529411765	0.0735294117647059	0.0514705882352941	0.0588235294117647	0.0367647058823529
0	0.404411764705882	0.242647058823529	0.125	0.161764705882353	0.139705882352941	0.125	0.0588235294117647	0.117647058823529	0.139705882352941	0.0661764705882353	0.0588235294117647	0.0588235294117647	0.0514705882352941	0.0441176470588235
10	0.404411764705882	0.235294117647059	0.125	0.176470588235294	0.139705882352941	0.132352941176471	0.0661764705882353	0.117647058823529	0.110294117647059	0.0588235294117647	0.0661764705882353	0.0588235294117647	0.0661764705882353	0.0294117647058824
20	0.397058823529412	0.235294117647059	0.110294117647059	0.169117647058824	0.132352941176471	0.117647058823529	0.0808823529411765	0.117647058823529	0.117647058823529	0.0661764705882353	0.0735294117647059	0.0588235294117647	0.0661764705882353	0.00735294117647059
30	0.397058823529412	0.235294117647059	0.125	0.154411764705882	0.147058823529412	0.110294117647059	0.0735294117647059	0.102941176470588	0.117647058823529	0.0588235294117647	0.0882352941176471	0.0367647058823529	0.0661764705882353	0.0147058823529412
40	0.404411764705882	0.242647058823529	0.125	0.154411764705882	0.125	0.110294117647059	0.0661764705882353	0.117647058823529	0.0955882352941176	0.0588235294117647	0.0661764705882353	0.0441176470588235	0.0514705882352941	0.00735294117647059
50	0.382352941176471	0.25	0.125	0.132352941176471	0.117647058823529	0.132352941176471	0.0588235294117647	0.0955882352941176	0.102941176470588	0.0661764705882353	0.0661764705882353	0.0147058823529412	0.0367647058823529	0
60	0.382352941176471	0.257352941176471	0.125	0.132352941176471	0.139705882352941	0.117647058823529	0.0514705882352941	0.125	0.102941176470588	0.0882352941176471	0.0661764705882353	0.0294117647058824	0.0514705882352941	0.00735294117647059
70	0.375	0.242647058823529	0.0955882352941176	0.139705882352941	0.125	0.102941176470588	0.0588235294117647	0.117647058823529	0.110294117647059	0.0808823529411765	0.0514705882352941	0.0441176470588235	0.0514705882352941	0.00735294117647059
80	0.360294117647059	0.25	0.102941176470588	0.139705882352941	0.117647058823529	0.110294117647059	0.0588235294117647	0.132352941176471	0.132352941176471	0.0735294117647059	0.0588235294117647	0.0367647058823529	0.0367647058823529	0.0294117647058824
90	0.330882352941176	0.264705882352941	0.0808823529411765	0.125	0.0882352941176471	0.0882352941176471	0.0588235294117647	0.117647058823529	0.117647058823529	0.0735294117647059	0.0588235294117647	0.0367647058823529	0.0220588235294118	0.0220588235294118
100	0.330882352941176	0.272058823529412	0.0882352941176471	0.125	0.102941176470588	0.0735294117647059	0.0661764705882353	0.102941176470588	0.110294117647059	0.0735294117647059	0.0514705882352941	0.0294117647058824	0.0441176470588235	0.0220588235294118
110	0.323529411764706	0.286764705882353	0.0735294117647059	0.117647058823529	0.110294117647059	0.0661764705882353	0.0661764705882353	0.102941176470588	0.110294117647059	0.0661764705882353	0.0514705882352941	0.0220588235294118	0.0367647058823529	0.0220588235294118
120	0.323529411764706	0.301470588235294	0.0882352941176471	0.125	0.0808823529411765	0.0661764705882353	0.0588235294117647	0.102941176470588	0.125	0.0882352941176471	0.0367647058823529	0.00735294117647059	0.0367647058823529	0.0147058823529412
130	0.338235294117647	0.323529411764706	0.0735294117647059	0.110294117647059	0.102941176470588	0.0661764705882353	0.0661764705882353	0.117647058823529	0.125	0.0661764705882353	0.0367647058823529	0.0220588235294118	0.0441176470588235	0.0294117647058824
140	0.316176470588235	0.330882352941176	0.0808823529411765	0.102941176470588	0.0955882352941176	0.0808823529411765	0.0661764705882353	0.0882352941176471	0.139705882352941	0.0514705882352941	0.0294117647058824	0.0147058823529412	0.0735294117647059	0.0294117647058824
150	0.316176470588235	0.308823529411765	0.0808823529411765	0.139705882352941	0.0882352941176471	0.0955882352941176	0.0588235294117647	0.0955882352941176	0.147058823529412	0.0588235294117647	0.0661764705882353	0.0367647058823529	0.0367647058823529	0.0294117647058824
160	0.308823529411765	0.301470588235294	0.0735294117647059	0.139705882352941	0.102941176470588	0.0735294117647059	0.0955882352941176	0.0882352941176471	0.125	0.0514705882352941	0.0661764705882353	0.0367647058823529	0.0147058823529412	0.0367647058823529
170	0.323529411764706	0.308823529411765	0.0882352941176471	0.161764705882353	0.110294117647059	0.0955882352941176	0.0955882352941176	0.0588235294117647	0.117647058823529	0.0661764705882353	0.0441176470588235	0.0367647058823529	0.0367647058823529	0.0294117647058824
180	0.323529411764706	0.301470588235294	0.0882352941176471	0.154411764705882	0.117647058823529	0.0661764705882353	0.117647058823529	0.0661764705882353	0.147058823529412	0.0514705882352941	0.0367647058823529	0.0441176470588235	0.0441176470588235	0.0294117647058824
190	0.330882352941176	0.294117647058824	0.0955882352941176	0.132352941176471	0.132352941176471	0.0661764705882353	0.110294117647059	0.0735294117647059	0.132352941176471	0.0294117647058824	0.0441176470588235	0.0367647058823529	0.0514705882352941	0.0220588235294118
200	0.330882352941176	0.301470588235294	0.102941176470588	0.147058823529412	0.139705882352941	0.0661764705882353	0.110294117647059	0.0735294117647059	0.139705882352941	0.0294117647058824	0.0367647058823529	0.0294117647058824	0.0514705882352941	0.0294117647058824
210	0.330882352941176	0.308823529411765	0.0955882352941176	0.132352941176471	0.132352941176471	0.0661764705882353	0.125	0.0661764705882353	0.132352941176471	0.0294117647058824	0.0294117647058824	0.0294117647058824	0.0441176470588235	0.0294117647058824
220	0.316176470588235	0.316176470588235	0.0955882352941176	0.132352941176471	0.139705882352941	0.0588235294117647	0.147058823529412	0.0882352941176471	0.154411764705882	0.0147058823529412	0.0441176470588235	0.0294117647058824	0.0367647058823529	0.0220588235294118
230	0.308823529411765	0.301470588235294	0.0882352941176471	0.110294117647059	0.125	0.0735294117647059	0.125	0.0735294117647059	0.154411764705882	0.0147058823529412	0.0441176470588235	0.0294117647058824	0.0514705882352941	0.0294117647058824
240	0.316176470588235	0.316176470588235	0.102941176470588	0.110294117647059	0.125	0.0735294117647059	0.147058823529412	0.0661764705882353	0.154411764705882	0.0294117647058824	0.0367647058823529	0.0220588235294118	0.0808823529411765	0.0367647058823529
250	NaN	NaN	NaN	NaN	NaN	NaN	NaN	NaN	NaN	NaN	NaN	NaN	NaN	NaN
260	NaN	NaN	NaN	NaN	NaN	NaN	NaN	NaN	NaN	NaN	NaN	NaN	NaN	NaN
270	NaN	NaN	NaN	NaN	NaN	NaN	NaN	NaN	NaN	NaN	NaN	NaN	NaN	NaN
280	NaN	NaN	NaN	NaN	NaN	NaN	NaN	NaN	NaN	NaN	NaN	NaN	NaN	NaN
290	NaN	NaN	NaN	NaN	NaN	NaN	NaN	NaN	NaN	NaN	NaN	NaN	NaN	NaN
300	NaN	NaN	NaN	NaN	NaN	NaN	NaN	NaN	NaN	NaN	NaN	NaN	NaN	NaN
