# Supplementary material for: Frontal eye field and caudate neurons make different contributions to reward-biased perceptual decisions
Source: eLife. 2020 Nov 27;9:e60535. doi: 10.7554/eLife.60535 (PMC7695458; doi:10.7554/eLife.60535)
Supplement: Figure 6—source data 1. [file elife-60535-fig6-data1.csv]

	Monkey	me_bias	neural ratio
1	A	0.4809964419122531	0.5268332355385168
2	A	0.26859127728457616	0.4468555392782151
22	A	0.20103860873045726	0.29555349162661937
24	A	0.14877980008513558	0.23711817771483498
36	A	0.23469233223495994	0.550989746705121
51	A	0.20625648172422992	0.1497321782342901
53	A	0.15080711380556716	0.33854533613219356
73	A	0.24785170447532967	0.2334465074327244
75	A	0.32882663881561996	0.19913384595133862
77	A	0.4179781128837726	0.26721427113784735
83	A	0.31063141127715094	0.5289771702579732
84	A	0.4320120022731125	0.25549899049743313
95	C	0.05164750678214543	0.2969709943646968
96	C	0.17831963113085197	0.2291269843543588
100	C	0.03891106882339252	0.022755215463488465
104	C	0.04766587975412008	0.07148912954474804
105	C	-0.007858966460581814	-0.24475860722446766
115	F	-0.009577868817790831	0.07846627105248588
120	F	0.07080860092703728	0.11378692722591545
126	F	0.09970776384675545	0.15708128631861792
130	F	0.10587224647444737	0.12682440893057714
140	F	0.21699152782916684	-0.27817216757376606
