# Supplementary material for: Frontal eye field and caudate neurons make different contributions to reward-biased perceptual decisions
Source: eLife. 2020 Nov 27;9:e60535. doi: 10.7554/eLife.60535 (PMC7695458; doi:10.7554/eLife.60535)
Supplement: Figure 6—source data 2. [file elife-60535-fig6-data2.csv]

	Monkey	me_bias	neural ratio
1	A	0.4809964419122531	0.10937666428552277
2	A	0.26859127728457616	0.6258060921238497
4	A	0.19088540661279862	0.5205089578313692
24	A	0.14877980008513558	0.31609286201139397
33	A	0.207375219604425	0.33002201150851906
49	A	0.360346838137773	0.03668085491874727
52	A	0.107267486716583	0.17328282642844509
61	A	0.3667023400080963	0.3334586654106115
72	A	0.19817643547974031	0.15268395014759245
73	A	0.24785170447532967	0.09911997872791765
74	A	0.28455899212926294	0.3306368949381547
75	A	0.32882663881561996	0.10144593369943818
76	A	0.283234989081238	0.42336114470197644
83	A	0.31063141127715094	0.7515634662259002
85	C	0.0038814800376966857	0.14238209335202698
87	C	0.1550020402113402	-0.09503889814011933
92	C	0.06298692042097367	0.037527266948463665
94	C	0.049754211273031694	0.112893385188921
96	C	0.17831963113085197	0.11541433586891059
97	C	0.03297867757340828	0.06916846374434055
98	C	0.04129905290983314	-0.12709006088556568
100	C	0.03891106882339252	-0.04634044465434134
103	C	0.040106325353086884	-0.4865925420378266
105	C	-0.007858966460581814	0.16659960046728572
106	C	0.01893396590726066	-0.1349061248997244
108	C	0.09833305059197577	0.08848279257792303
115	F	-0.009577868817790831	0.05382685192177309
130	F	0.10587224647444737	-0.04752031380768088
140	F	0.21699152782916684	0.31090931453759785
