# Supplementary material for: Frontal eye field and caudate neurons make different contributions to reward-biased perceptual decisions
Source: eLife. 2020 Nov 27;9:e60535. doi: 10.7554/eLife.60535 (PMC7695458; doi:10.7554/eLife.60535)
Supplement: Figure 6—source data 3. [file elife-60535-fig6-data3.csv]

	Monkey	me_bias	neural ratio
2	A	0.233621596	0.15094627089036772
11	A	0.347206357	0.01759551319322702
15	A	0.24560531600000002	-0.34926658785550574
17	A	0.170189429	-0.35825997885455435
18	C	-0.030794234999999996	-0.020976388498676102
19	C	0.044603316999999996	0.1515401783544272
21	C	0.040561522	0.08049731253446876
22	C	0.037346014	0.009839332776827994
26	C	0.057591859999999995	-0.06717250952628513
27	C	0.040526347000000004	0.19568095937952093
32	C	0.11607272700000001	0.10625134852779612
33	C	0.128400477	-0.006400701987481343
38	C	0.052575965	0.04011976885930456
39	C	0.169586779	0.06984778242938533
40	C	0.21793629799999997	-0.04888811101561695
42	C	0.120384647	0.14290782122886783
44	C	0.116173902	-0.0346940973321999
46	C	0.09968633199999999	-0.0013454386570969207
47	C	0.11325464600000001	-0.01266703084404841
49	C	0.085503013	-0.0009116277597311543
61	C	0.059861176	-0.04547937437655452
66	C	-0.026979086	0.42071569029383726
76	F	0.0030234280000000086	0.13750529540026127
89	F	0.074218799	-0.03521184579264028
90	F	0.093584846	0.008821588085507282
96	F	0.10548415300000001	-0.35589798115644933
97	F	0.16771777300000001	-0.10174098133976894
103	F	0.324457188	-0.2425830435262061
126	F	0.080093999	0.01866584981012752
127	F	0.147844281	-0.18916692524165407
137	F	0.144998086	-0.24136929262887685
138	F	0.23778602299999999	0.20104136160268055
