# Supplementary material for: Frontal eye field and caudate neurons make different contributions to reward-biased perceptual decisions
Source: eLife. 2020 Nov 27;9:e60535. doi: 10.7554/eLife.60535 (PMC7695458; doi:10.7554/eLife.60535)
Supplement: Figure 6—source data 4. [file elife-60535-fig6-data4.csv]

	Monkey	me_bias	neural ratio
2	A	0.233621596	0.13547420707378877
10	A	0.295612673	-0.01819790413538057
15	A	0.24560531600000002	-0.3628780913132145
16	A	0.395268799	0.23174328134221872
18	C	-0.030794234999999996	-0.05986952276278952
19	C	0.044603316999999996	0.2860521882748576
21	C	0.040561522	-0.44657087619086666
22	C	0.037346014	0.32472622721037586
23	C	0.05646232600000001	0.09215074996961548
24	C	0.080142702	-0.10419701608364354
27	C	0.040526347000000004	0.058361717359186716
28	C	0.037838558	-0.007666424867284461
32	C	0.11607272700000001	0.24444437223541046
33	C	0.128400477	0.05389850364478789
34	C	0.109809949	0.020941012868866085
39	C	0.169586779	-0.05424353750373406
40	C	0.21793629799999997	-0.025581995240718528
42	C	0.120384647	0.08474412690583318
44	C	0.116173902	-0.06117675692283715
46	C	0.09968633199999999	0.07803167252095901
47	C	0.11325464600000001	0.1276986455634423
49	C	0.085503013	0.12616137389772916
54	C	0.10307271999999999	0.04713405789674407
58	C	0.164213838	0.15978087571560004
61	C	0.059861176	0.023531078764911582
64	C	0.08227969900000001	-0.13591387628330662
68	F	0.220063173	0.23133607207475293
76	F	0.0030234280000000086	0.20142979437452344
82	F	0.12182609	-0.3548154429570555
87	F	0.11901171699999999	0.07773241799107436
89	F	0.074218799	0.09067980138132468
90	F	0.093584846	0.05095596817287089
96	F	0.10548415300000001	0.05343649997853851
97	F	0.16771777300000001	0.14725786034320598
103	F	0.324457188	0.01532674282002203
105	F	0.089411131	0.18608053207184877
109	F	0.26781548	0.11291289322057776
125	F	0.133517733	-0.07000053709748642
126	F	0.080093999	0.0230200602021531
127	F	0.147844281	-0.031459186954269816
131	F	0.158130188	0.06044879320685739
137	F	0.144998086	-0.03898595819749037
138	F	0.23778602299999999	0.1362484381476076
